# Supplementary material for: One-step assembly of alkoxypyrroloindolines via iodine-catalyzed alkoxycyclization of indole derivatives
Source: Royal Society of Chemistry journal article supplement (doi:10.1039/c9ob02287b), 2019-11-15

## Supporting Information

### One-step assembly of alkoxyppyrroloindolines via iodine-catalyzed alkoxycyclization of indole derivatives

Yan Li, Juan Guo, Xunbo Lu, Fangrui Zhong\*

Hubei Key Laboratory of Bioinorganic Chemistry & Materia Medica, School of Chemistry and Chemical Engineering, Huazhong University of Science and Technology (HUST), 1037 Luoyu road, Wuhan 430074, China

[chemzfr@hust.edu.cn](mailto:chemzfr@hust.edu.cn)

## Content

|                                                                             |    |
|-----------------------------------------------------------------------------|----|
| A. General Information.....                                                 | 3  |
| B. Representative Procedure .....                                           | 3  |
| C. Analytical Data of the Alkoxy pyrroloindoline Products.....              | 4  |
| D. Scale-up Reaction and Synthesis of CPC-1 .....                           | 14 |
| E. X-Ray crystallographic analysis of <b>2a</b> .....                       | 15 |
| F. Mechanistic study .....                                                  | 16 |
| G. <sup>1</sup> H and <sup>13</sup> C NMR spectra data of all products..... | 17 |

## A. General Information

Chemicals and solvents were purchased from commercial suppliers and used as received unless noted. All products were purified by flash chromatography on silica gel. The chemical yields referred are isolated products.  $^1\text{H}$  NMR and  $^{13}\text{C}$  NMR spectra were recorded on 400 MHz or 600 MHz Bruker spectrometers. Chemical shifts of  $^1\text{H}$  NMR were reported in part per million relative to the  $\text{CDCl}_3$  residual peak ( $\delta$  7.26). Chemical shifts of  $^{13}\text{C}$  NMR were reported relative to  $\text{CDCl}_3$  ( $\delta$  77.16). The used abbreviations are as follows: s (singlet), d (doublet), t (triplet), quart. (quartet), quint. (quintet), m (multiplet), br (broad). Multiplets which arise from accidental equality of coupling constants of magnetically non-equivalent protons are marked as virtual (*virt.*). Melting points were measured on a SGW® X-4B and are not corrected. Reactions were monitored by TLC analysis using silica gel 60 Å F-254 thin layer plates and compounds were visualized with a UV light at 254 nm or 365 nm. Further visualization was achieved by staining with  $\text{KMnO}_4$  followed by heating on a hot plate. Flash column chromatography was performed on silica gel 60 Å, 10–40  $\mu\text{m}$ .

Substrate **1** were synthesized by following known procedures.<sup>1</sup>

## B. Representative Procedure

A 50 mL round bottom flask was charged with  $\text{I}_2$  (5.1 mg, 10 mol %), tryptamine substrates **1** (0.2 mmol, 1.0 equiv) and alcohol (12 mL), then TBHP (70% in water, 57.2  $\mu\text{L}$ , 0.4 mmol, 2.0 equiv) was added. The reaction mixture was heat to 65 °C for 3 h before cooled down to room temperature. Saturated aqueous  $\text{Na}_2\text{S}_2\text{O}_3$  (10 mL) solution was slowly introduced and the resulting mixture was extracted with EtOAc (3  $\times$  10 mL). The combined organic layers were dried over  $\text{Na}_2\text{SO}_4$ , filtered, concentrated under reduced pressure and the residue was purified by chromatography on silica gel (eluent: Hexane/EtOAc, 30:1 to 10:1) to afford methoxypyrrroloindolenine **2**. In the case of using pentanol and hexanol, distillation was performed under reduced pressure to recovered the alcohols before chromatography.

---

<sup>1</sup> D. Liu, Z. Hu, Y. Zhang, M. Gong, Z. Fu, W. Huang, *Chem. Eur. J.* **2019**, *25*, 11223 – 11227.

## C. Analytical Data of the Alkoxy pyrroloindoline Products

### 3a-Methoxy-8-methyl-1-tosyl-1,2,3,3a,8,8a-hexahydropyrrolo[2,3-b]indole 2a

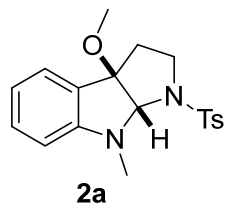

Compound **2a** was synthesized following the *general procedure*.

A white solid, 50.2 mg, 70% yield.

**m.p.:** 117 – 119 °C.

**TLC:**  $R_f = 0.74$  (Hexane/EtOAc = 3:1) [UV, KMnO<sub>4</sub>].

**<sup>1</sup>H NMR** (400 MHz, CDCl<sub>3</sub>)  $\delta$  7.84 – 7.72 (m, 2H), 7.40 – 7.28 (m, 2H), 7.21 (*virt. td*,  $J \cong 7.8, 1.3$  Hz, 1H), 7.07 (dd,  $J = 7.5, 1.3$  Hz, 1H), 6.71 (*virt. td*,  $J \cong 7.5, 0.8$  Hz, 1H), 6.47 (d,  $J = 7.8$  Hz, 1H), 5.36 (s, 1H), 3.56 (ddd,  $J = 11.4, 7.7, 2.6$  Hz, 1H), 3.14 – 3.06 (m, 1H), 3.02 (s, 3H), 2.96 (s, 3H), 2.44 (s, 3H), 2.07 (ddd,  $J = 12.2, 5.7, 2.6$  Hz, 1H), 1.80 (ddd,  $J = 12.3, 11.0, 7.7$  Hz, 1H).

**<sup>13</sup>C NMR** (101 MHz, CDCl<sub>3</sub>)  $\delta$  152.0, 143.8, 136.4, 130.7, 129.9, 127.4, 124.9, 124.0, 117.9, 106.9, 93.9, 86.2, 52.8, 47.6, 38.8, 31.5, 21.7.

**IR** (KBr/cm<sup>-1</sup>) 3054.2, 2946.0, 2828.4, 1608.9, 1491.2, 1464.9, 1347.3, 1160.0, 1091.1, 1021.1, 928.0, 813.1, 748.2, 664.8.

**HRMS (ESI):** C<sub>19</sub>H<sub>23</sub>N<sub>2</sub>O<sub>3</sub>S [(M+H)<sup>+</sup>]: calcd.: 359.1424; found: 359.1433.

### 3a-Methoxy-4,8-dimethyl-1-tosyl-1,2,3,3a,8,8a-hexahydropyrrolo[2,3-b]indole 2b

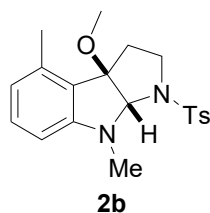

Compound **2b** was synthesized following the *general procedure*.

A white solid, 46.9 mg, 63% yield.

**m.p.:** 139 – 141 °C.

**TLC:**  $R_f = 0.73$  (Hexane/EtOAc = 3:1) [UV, KMnO<sub>4</sub>].

**<sup>1</sup>H NMR** (400 MHz, CDCl<sub>3</sub>)  $\delta$  7.84 – 7.72 (m, 2H), 7.40 – 7.28 (m, 2H), 7.10 (*virt. t*,  $J \cong 7.7$  Hz, 1H), 6.48 (d,  $J = 7.5$  Hz, 1H), 6.30 (d,  $J = 7.5$  Hz, 1H), 5.37 (s, 1H), 3.60 – 3.52 (m, 1H), 3.20 (*virt. td*,  $J \cong 10.8, 6.4$  Hz, 1H), 2.99 (s, 3H), 2.92 (s, 3H), 2.44 (s, 3H), 2.20 (s, 3H), 2.18 – 2.12 (m, 1H), 1.91 – 1.79 (m, 1H).

**<sup>13</sup>C NMR** (101 MHz, CDCl<sub>3</sub>)  $\delta$  151.9, 143.8, 136.3, 135.3, 130.5, 129.8, 127.5, 122.0, 120.0, 104.4, 94.9, 86.4, 52.8, 47.5, 38.1, 31.7, 21.7, 17.1.

**IR** (KBr/cm<sup>-1</sup>) 3034.8, 2924.7, 2854.9, 1735.4, 1614.8, 1496.7, 1465.9, 1347.2, 1161.1, 1090.6, 1023.7, 935.1, 809.8, 622.4.

**HRMS (ESI):** C<sub>20</sub>H<sub>24</sub>N<sub>2</sub>NaO<sub>3</sub>S [(M+Na)<sup>+</sup>]: calcd.: 395.1400; found: 395.1405.

**5-Chloro-3a-methoxy-8-methyl-1-tosyl-1,2,3,3a,8,8a-hexahydropyrrolo[2,3-*b*]indole 2c**

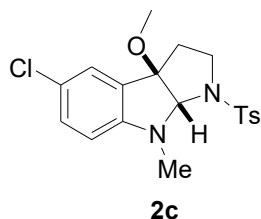

Compound **2c** was synthesized following the *general procedure*.

A white solid, 53.4 mg, 68% yield.

**m.p.:** 125 – 127 °C.

**TLC:** *R<sub>f</sub>* = 0.82 (Hexane/EtOAc = 3:1) [UV, KMnO<sub>4</sub>].

**<sup>1</sup>H NMR** (400 MHz, CDCl<sub>3</sub>) δ 7.84 – 7.72 (m, 2H), 7.40 – 7.28 (m, 2H), 7.15 (d, *J* = 8.4 Hz, 1H), 7.01 (s, 1H), 6.37 (d, *J* = 8.4 Hz, 1H), 5.36 (s, 1H), 3.63 – 3.49 (m, 1H), 3.10 (*virt. td*, *J* ≅ 11.3, 4.8 Hz, 1H), 2.99 (s, 3H), 2.97 (s, 3H), 2.44 (s, 3H), 2.03 (dd, *J* = 11.2, 4.8 Hz, 1H), 1.78 (*virt. td*, *J* ≅ 11.2, 8.0 Hz, 1H).

**<sup>13</sup>C NMR** (101 MHz, CDCl<sub>3</sub>) δ 150.4, 143.9, 136.1, 130.5, 129.9, 127.4, 126.8, 124.1, 122.5, 107.7, 93.5, 86.3, 53.0, 47.5, 38.7, 31.5, 21.6.

**IR** (KBr/cm<sup>-1</sup>) 3061.3, 2926.5, 1734.1, 1605.3, 1491.2, 1348.1, 1263.2, 1161.3, 1080.0, 1022.3, 933.6, 807.8, 748.7, 665.2, 574.7, 546.7.

**HRMS (ESI):** C<sub>19</sub>H<sub>21</sub><sup>35</sup>ClN<sub>2</sub>NaO<sub>3</sub>S [(M+Na)<sup>+</sup>]: calcd.: 415.0854; found: 415.0856.

**5-Fluoro-3a-methoxy-8-methyl-1-tosyl-1,2,3,3a,8,8a-hexahydropyrrolo[2,3-*b*]indole 2d**

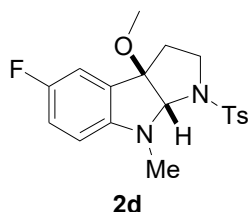

Compound **2d** was synthesized following the *general procedure*.

A liquid, 44.4 mg, 59% yield.

**TLC:** *R<sub>f</sub>* = 0.77 (Hexane/EtOAc = 3:1) [UV, KMnO<sub>4</sub>].

**<sup>1</sup>H NMR** (400 MHz, CDCl<sub>3</sub>) δ 7.84 – 7.72 (m, 2H), 7.40 – 7.28 (m, 2H), 6.94 – 6.89 (m, 1H), 6.80 (dd, *J* = 8.5, 2.3 Hz, 1H), 6.37 (dd, *J* = 8.5, 3.8 Hz, 1H), 5.34 (s, 1H), 3.59 – 3.53 (m, 1H), 3.12 (*virt. td*, *J* ≅ 11.0, 5.9 Hz, 1H), 2.99 (s, 3H), 2.97 (s, 3H), 2.44 (s, 3H), 2.10 – 1.98 (m, 1H), 1.89 – 1.76 (m, 1H).

**<sup>13</sup>C NMR** (101 MHz, CDCl<sub>3</sub>) δ 156.5 (d, *J* = 235.5 Hz), 148.2, 143.9, 136.2, 129.9, 127.4, 126.3 (d, *J* = 7.8 Hz), 117.0 (d, *J* = 23.3 Hz), 111.2 (d, *J* = 24.0 Hz), 107.4 (d, *J* = 6.9 Hz), 93.6, 86.7, 53.0, 47.6, 38.7, 32.2.

**IR** (KBr/cm<sup>-1</sup>) 3062.9, 2928.7, 1622.5, 1497.1, 1373.5, 1243.4, 1161.2, 1125.5, 1024.2, 942.7, 840.6, 745.8, 663.7.

**HRMS (ESI):** C<sub>19</sub>H<sub>21</sub>FN<sub>2</sub>NaO<sub>3</sub>S [(M+Na)<sup>+</sup>]: calcd.: 399.1149; found: 399.1151.

### 5-Bromo-3a-methoxy-8-methyl-1-tosyl-1,2,3,3a,8,8a-hexahydropyrrolo[2,3-*b*]indole **2e**

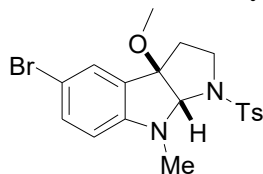

**2e**

Compound **2e** was synthesized following the *general procedure*.

A white solid, 53.4 mg, 61% yield.

**m.p.:** 116 – 118 °C.

**TLC:**  $R_f = 0.74$  (Hexane/EtOAc = 3:1) [UV,  $\text{KMnO}_4$ ].

**$^1\text{H NMR}$**  (400 MHz,  $\text{CDCl}_3$ )  $\delta$  7.84 – 7.72 (m, 2H), 7.40 – 7.28 (m, 2H), 7.21 (*virt. t.*,  $J \cong 7.6$  Hz, 1H), 7.07 (d,  $J = 7.2$  Hz, 1H), 6.71 (*virt. t.*,  $J \cong 7.6$  Hz, 1H), 6.47 (d,  $J = 7.2$  Hz, 1H), 5.36 (s, 1H), 3.63 – 3.51 (m, 1H), 3.10 (*virt. td.*,  $J \cong 12.4, 5.8$  Hz, 1H), 3.02 (s, 3H), 2.96 (s, 3H), 2.44 (s, 3H), 2.07 (dd,  $J = 12.4, 5.8$  Hz, 1H), 1.85 – 1.77 (m, 1H).

**$^{13}\text{C NMR}$**  (101 MHz,  $\text{CDCl}_3$ )  $\delta$  152.0, 143.8, 136.4, 130.7, 129.9, 127.4, 124.9, 124.0, 117.9, 106.9, 93.9, 86.2, 52.8, 47.6, 38.8, 31.6, 21.6.

**IR** ( $\text{KBr}/\text{cm}^{-1}$ ) 3053.8, 2953.2, 1727.6, 1609.0, 1491.2, 1464.1, 1347.4, 1160.0, 1091.0, 1021.2, 928.0, 813.1, 748.2, 664.8, 572.7, 545.7.

**HRMS (ESI):**  $\text{C}_{19}\text{H}_{21}^{79}\text{BrN}_2\text{NaO}_3\text{S}$  [(M+Na) $^+$ ]: calcd.: 459.0348; found: 459.0351.

**HRMS (ESI):**  $\text{C}_{19}\text{H}_{21}^{81}\text{BrN}_2\text{NaO}_3\text{S}$  [(M+Na) $^+$ ]: calcd.: 461.0328; found: 461.0331.

### 3a-Methoxy-5,8-dimethyl-1-tosyl-1,2,3,3a,8,8a-hexahydropyrrolo[2,3-*b*]indole **2f**

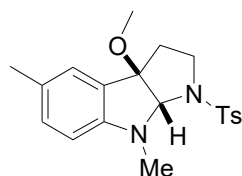

**2f**

Compound **2f** was synthesized following the *general procedure*.

A white solid, 45.5 mg, 61% yield.

**m.p.:** 108 – 110 °C.

**TLC:**  $R_f = 0.80$  (Hexane/EtOAc = 3:1) [UV,  $\text{KMnO}_4$ ].

**$^1\text{H NMR}$**  (400 MHz,  $\text{CDCl}_3$ )  $\delta$  7.79 – 7.77 (m, 2H), 7.35 – 7.33 (m, 2H), 7.02 (dd,  $J = 8.0, 1.0$  Hz, 1H), 6.87 (d,  $J = 1.0$  Hz, 1H), 6.39 (d,  $J = 8.0$  Hz, 1H), 5.32 (s, 1H), 3.58 – 3.52 (m, 1H), 3.16 – 3.06 (m, 1H), 2.99 (s, 3H), 2.96 (s, 3H), 2.44 (s, 3H), 2.25 (s, 3H), 2.06 (ddd,  $J = 12.3, 5.8, 3.2$  Hz, 1H), 1.82 (ddd,  $J = 12.3, 10.7, 7.7$  Hz, 1H).

**$^{13}\text{C NMR}$**  (101 MHz,  $\text{CDCl}_3$ )  $\delta$  150.0, 143.7, 136.4, 131.1, 129.8, 127.4, 127.3, 125.1, 124.5, 107.0, 93.9, 86.6, 52.8, 47.7, 38.6, 32.1, 21.6, 20.8.

**IR** ( $\text{KBr}/\text{cm}^{-1}$ ) 3057.5, 2927.6, 2856.1, 1736.4, 1614.5, 1497.5, 1465.8, 1349.2, 1163.9, 1090.7, 1028.2, 936.0, 806.3, 669.4.

**HRMS (ESI):**  $\text{C}_{20}\text{H}_{24}\text{N}_2\text{NaO}_3\text{S}$  [(M+Na) $^+$ ]: calcd.: 395.1400; found: 395.1403.

### 3a-Methoxy-6,8-dimethyl-1-tosyl-1,2,3,3a,8,8a-hexahydropyrrolo[2,3-*b*]indole **2g**

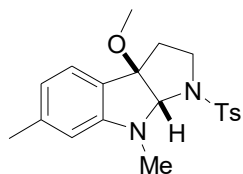

**2g**

Compound **2g** was synthesized following the *general procedure*.

A white solid, 46.9 mg, 63% yield.

**m.p.:** 103 – 105 °C.

**TLC:**  $R_f$  = 0.70 (Hexane/EtOAc = 3:1) [UV, KMnO<sub>4</sub>].

**<sup>1</sup>H NMR** (400 MHz, CDCl<sub>3</sub>) δ 7.79 – 7.77 (m, 2H), 7.35 – 7.33 (m, 2H), 7.02 (d,  $J$  = 7.8 Hz, 1H), 6.87 (s, 1H), 6.39 (d,  $J$  = 8.0 Hz, 1H), 5.32 (s, 1H), 3.58 – 3.52 (m, 1H), 3.11 (*virt. td*,  $J$  ≅ 11.1, 5.8 Hz, 1H), 2.99 (s, 3H), 2.96 (s, 3H), 2.44 (s, 3H), 2.25 (s, 3H), 2.09 – 2.04 (m, 1H), 1.89 – 1.76 (m, 1H).

**<sup>13</sup>C NMR** (101 MHz, CDCl<sub>3</sub>) δ 150.0, 143.7, 136.4, 131.1, 129.8, 127.4, 127.3, 125.1, 124.5, 107.0, 93.9, 86.6, 52.8, 47.7, 38.6, 32.1, 21.6, 20.8.

**IR** (KBr/cm<sup>-1</sup>) 3067.9, 2931.5, 2856.9, 1737.9, 1632.0, 1497.4, 1460.7, 1345.6, 1159.8, 1096.1, 1033.2, 935.2, 811.5, 667.8.

**HRMS (ESI):** C<sub>20</sub>H<sub>24</sub>N<sub>2</sub>NaO<sub>3</sub>S [(M+Na)<sup>+</sup>]: *calcd.*: 395.1400; *found*: 395.1400.

### 3a,5-Dimethoxy-8-methyl-1-tosyl-1,2,3,3a,8,8a-hexahydropyrrolo[2,3-*b*]indole **2h**

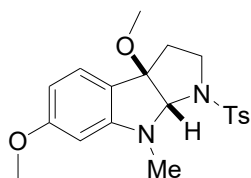

**2h**

Compound **2h** was synthesized following the *general procedure*.

A white solid, 36.5 mg, 47% yield.

**m.p.:** 138 – 140 °C.

**TLC:**  $R_f$  = 0.71 (Hexane/EtOAc = 3:1) [UV, KMnO<sub>4</sub>].

**<sup>1</sup>H NMR** (400 MHz, CDCl<sub>3</sub>) δ 7.79 – 7.77 (m, 2H), 7.35 – 7.33 (m, 2H), 6.79 (dd,  $J$  = 8.6, 2.6 Hz, 1H), 6.68 (d,  $J$  = 2.6 Hz, 1H), 6.41 (d,  $J$  = 8.6 Hz, 1H), 5.30 (d,  $J$  = 2.8 Hz, 1H), 3.74 (s, 3H), 3.58 – 3.52 (m, 1H), 3.55 (ddd,  $J$  = 11.2, 7.7, 3.2 Hz, 1H), 2.97 (s, 3H), 2.97 (s, 3H), 2.44 (s, 3H), 2.07 (ddd,  $J$  = 11.8, 5.6, 3.0 Hz, 1H), 1.85 (ddd,  $J$  = 12.4, 10.3, 7.7 Hz, 1H).

**<sup>13</sup>C NMR** (101 MHz, CDCl<sub>3</sub>) δ 153.0, 146.4, 143.8, 136.4, 129.8, 127.5, 126.3, 115.9, 110.4, 108.0, 93.9, 87.0, 56.1, 52.9, 47.7, 38.7, 32.8, 21.7.

**IR** (KBr/cm<sup>-1</sup>) 3362.6, 2924.1, 2853.2, 1738.4, 1620.2, 1499.2, 1346.5, 1249.8, 1160.5, 1102.7, 1027.0, 934.9, 814.3, 703.4.

**HRMS (ESI):** C<sub>20</sub>H<sub>24</sub>N<sub>2</sub>NaO<sub>4</sub>S [(M+Na)<sup>+</sup>]: calcd.: 411.1349; found: 411.1351.

**6-Fluoro-3a-methoxy-8-methyl-1-tosyl-1,2,3,3a,8,8a-hexahydropyrrolo[2,3-*b*]indole 2i**

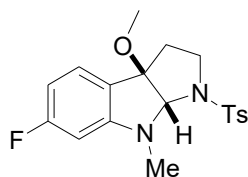

**2i**

Compound **2i** was synthesized following the *general procedure*.

A white solid, 48.2 mg, 64% yield.

**m.p.:** 109 – 111 °C.

**TLC:** R<sub>f</sub> = 0.79 (Hexane/EtOAc = 3:1) [UV, KMnO<sub>4</sub>].

**<sup>1</sup>H NMR** (400 MHz, CDCl<sub>3</sub>) δ 7.79 – 7.77 (m, 2H), 7.35 – 7.33 (m, 2H), 7.01 – 6.93 (m, 1H), 6.36 (*virt.* t, *J* ≅ 8.6 Hz, 1H), 6.14 (d, *J* = 10.1 Hz, 1H), 5.38 (s, 1H), 3.63 – 3.50 (m, 1H), 3.08 (td, *J* = 11.6, 5.5 Hz, 1H), 2.99 (s, 3H), 2.96 (s, 3H), 2.44 (s, 3H), 2.09 – 1.96 (m, 1H), 1.83 – 1.69 (m, 1H).

**<sup>13</sup>C NMR** (101 MHz, CDCl<sub>3</sub>) δ 165.6 (d, *J* = 244.8 Hz), 153.6 (d, *J* = 12.0 Hz), 143.9, 136.3, 129.9, 127.4, 125.0 (d, *J* = 12.0 Hz), 120.4, 104.0 (d, *J* = 25.1 Hz), 94.5 (d, *J* = 25.1 Hz), 93.4, 86.5, 52.7, 47.5, 38.7, 31.2, 21.6.

**IR** (KBr/cm<sup>-1</sup>) 3063.8, 2929.8, 1600.3, 1457.2, 1345.7, 1163.2, 1095.6, 1024.3, 942.7, 840.6, 705.8, 665.7.

**HRMS (ESI):** C<sub>19</sub>H<sub>21</sub>FN<sub>2</sub>NaO<sub>3</sub>S [(M+Na)<sup>+</sup>]: calcd.: 399.1149; found: 399.1150.

**6-Chloro-3a-methoxy-8-methyl-1-tosyl-1,2,3,3a,8,8a-hexahydropyrrolo[2,3-*b*]indole 2j**

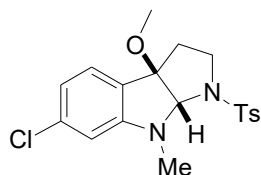

**2j**

Compound **2j** was synthesized following the *general procedure*.

A white solid, 47.9 mg, 61% yield.

**m.p.:** 105 – 107 °C.

**TLC:** R<sub>f</sub> = 0.76 (Hexane/EtOAc = 3:1) [UV, KMnO<sub>4</sub>].

**<sup>1</sup>H NMR** (400 MHz, CDCl<sub>3</sub>) δ 7.79 – 7.77 (m, 2H), 7.35 – 7.33 (m, 2H), 6.95 (d, *J* = 7.7 Hz, 1H), 6.66 (d, *J* = 7.7 Hz, 1H), 6.42 (s, 1H), 5.37 (s, 1H), 3.62 – 3.50 (m, 1H), 3.08 (*virt.* td, *J* ≅ 11.6, 5.7 Hz, 1H), 2.99 (s, 3H), 2.96 (s, 3H), 2.44 (s, 3H), 2.09 – 1.94 (m, 1H), 1.84 – 1.70 (m, 1H).

**<sup>13</sup>C NMR** (101 MHz, CDCl<sub>3</sub>) δ 152.9, 143.9, 136.6, 136.2, 129.9, 127.4, 124.9, 123.5, 117.6, 106.9, 93.4, 86.2, 52.8, 47.5, 38.7, 31.2, 21.6.

**IR** (KBr/cm<sup>-1</sup>) 3063.5, 2927.9, 1735.3, 1607.2, 1493.4, 1427.9, 1300.7, 1203.8, 1114.1, 1023.3, 981.1, 877.4, 809.2, 752.3, 665.5, 593.3, 575.2.

**HRMS (ESI):** C<sub>19</sub>H<sub>21</sub><sup>35</sup>ClN<sub>2</sub>NaO<sub>3</sub>S [(M+Na)<sup>+</sup>]: calcd.: 415.0854; found: 415.0855.



### 3a-Methoxy-7,8-dimethyl-1-tosyl-1,2,3,3a,8,8a-hexahydropyrrolo[2,3-*b*]indole **2k**

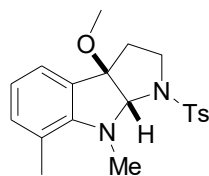

**2k**

Compound **2k** was synthesized following the *general procedure*.

A white solid, 44.7 mg, 60% yield.

**m.p.:** 77 – 79 °C.

**TLC:**  $R_f$  = 0.81 (Hexane/EtOAc = 3:1) [UV, KMnO<sub>4</sub>].

**<sup>1</sup>H NMR** (400 MHz, CDCl<sub>3</sub>)  $\delta$  7.79 – 7.77 (m, 2H), 7.35 – 7.33 (m, 2H), 6.97 (*virt. dt*,  $J \cong 7.6, 2.1, 0.81$  Hz, 2H), 6.77 (*virt. t*,  $J \cong 7.6$  Hz, 1H), 5.20 (s, 1H), 3.62 – 3.56 (m, 1H), 3.14 (s, 3H), 2.99 (s, 3H), 2.95 – 2.82 (m, 1H), 2.41 (s, 3H), 2.20 (d,  $J = 4.6$  Hz, 3H), 2.19 – 2.15 (m, 2H).

**<sup>13</sup>C NMR** (101 MHz, CDCl<sub>3</sub>)  $\delta$  151.4, 143.3, 137.2, 133.4, 129.5, 127.4, 127.4, 122.0, 121.9, 120.7, 93.5, 88.8, 53.0, 46.6, 38.5, 38.3, 21.6, 18.9.

**IR** (KBr/cm<sup>-1</sup>) 3057.9, 2988.3, 2854.7, 1755.8, 1613.3, 1498.7, 1348.9, 1162.5, 1092.3, 1025.4, 937.8, 812.2, 669.8.

**HRMS (ESI):** C<sub>20</sub>H<sub>25</sub>N<sub>2</sub>O<sub>3</sub>S [(M+H)<sup>+</sup>]: calcd.: 373.1580; found: 373.1581.

### 3a-Methoxy-8-methyl-1-(methylsulfonyl)-1,2,3,3a,8,8a-hexahydropyrrolo[2,3-*b*]indole **2l**

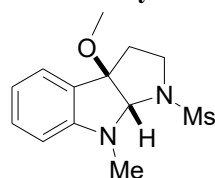

**2l**

Compound **2l** was synthesized following the *general procedure*.

A liquid, 40.7 mg, 72% yield.

**TLC:**  $R_f$  = 0.27 (Hexane/EtOAc = 3:1) [UV, KMnO<sub>4</sub>].

**<sup>1</sup>H NMR** (400 MHz, CDCl<sub>3</sub>)  $\delta$  7.27 (*virt. t*,  $J \cong 7.8$  Hz, 1H), 7.18 (d,  $J = 7.9$  Hz, 1H), 6.81 (*virt. t*,  $J \cong 7.9$  Hz, 1H), 6.54 (d,  $J = 7.8$  Hz, 1H), 5.26 (s, 1H), 3.72 (*virt. t*,  $J \cong 8.7$  Hz, 1H), 3.18 – 3.11 (m, 1H), 3.07 (s, 3H), 3.00 (s, 3H), 2.95 (s, 3H), 2.52 – 2.39 (m, 1H), 2.35 (dd,  $J = 11.4, 5.0$  Hz, 1H).

**<sup>13</sup>C NMR** (101 MHz, CDCl<sub>3</sub>)  $\delta$  152.3, 130.9, 125.3, 124.3, 118.7, 107.8, 94.2, 86.5, 53.1, 47.2, 39.2, 38.5, 33.1.

**IR** (KBr/cm<sup>-1</sup>) 3363.4, 3195.4, 2927.7, 2829.7, 1736.8, 1609.2, 1490.9, 1465.0, 1337.3, 1203.1, 1153.9, 1105.5, 1024.8, 929.6, 875.5, 815.1, 755.8.

**HRMS (ESI):** C<sub>21</sub>H<sub>25</sub>N<sub>2</sub>O<sub>4</sub>S [(M+H)<sup>+</sup>]: calcd.: 401.1530; found: 401.1534.

### 3a-Methoxy-1-tosyl-1,2,3,3a,8,8a-hexahydropyrrolo[2,3-b]indole **2m**

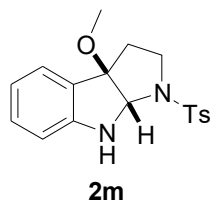

Compound **2m** was synthesized following the *general procedure*.

A white solid, 33.1 mg, 48% yield.

**m.p.:** 121 – 123 °C.

**TLC:**  $R_f$  = 0.66 (Hexane/EtOAc = 3:1) [UV, KMnO<sub>4</sub>].

**<sup>1</sup>H NMR** (400 MHz, CDCl<sub>3</sub>)  $\delta$  7.79 – 7.77 (m, 2H), 7.35 – 7.33 (m, 2H), 7.18 (dd,  $J$  = 15.8, 7.6 Hz, 2H), 6.81 (*virt. t*,  $J \cong 7.4$  Hz, 1H), 6.66 (d,  $J$  = 7.4 Hz, 1H), 5.21 (s, 1H), 4.95 (s, 1H), 3.47 – 3.34 (m, 1H), 3.21 (dd,  $J$  = 15.9, 9.4 Hz, 1H), 3.01 (s, 3H), 2.44 (s, 3H), 2.35 – 2.25 (m, 1H), 2.24 – 2.13 (m, 1H).

**<sup>13</sup>C NMR** (101 MHz, CDCl<sub>3</sub>)  $\delta$  150.5, 143.9, 135.5, 130.7, 129.9, 127.4, 125.1, 124.5, 119.5, 110.3, 94.2, 80.1, 52.6, 46.9, 37.4, 21.6.

**IR** (KBr/cm<sup>-1</sup>) 3400.1, 3369.1, 3053.5, 2951.6, 2923.8, 2854.1, 1737.3, 1609.4, 1468.2, 1335.6, 1201.7, 1159.2, 1092.1, 1055.4, 937.9, 812.3, 751.4, 662.5.

**HRMS (ESI):** C<sub>18</sub>H<sub>21</sub>N<sub>2</sub>O<sub>3</sub>S [(M+H)<sup>+</sup>]: calcd.: 345.1267; found: 345.1280.

### 8-Benzyl-3a-methoxy-1-tosyl-1,2,3,3a,8,8a-hexahydropyrrolo[2,3-b]indole **2n**

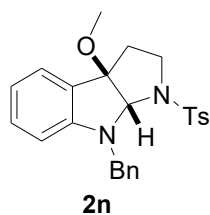

Compound **2n** was synthesized following the *general procedure*.

A liquid, 78.2 mg, 90% yield.

**TLC:**  $R_f$  = 0.79 (Hexane/EtOAc = 3:1) [UV, KMnO<sub>4</sub>].

**<sup>1</sup>H NMR** (400 MHz, CDCl<sub>3</sub>)  $\delta$  7.79 – 7.77 (m, 2H), 7.35 – 7.33 (m, 2H), 7.30 (d,  $J$  = 7.3 Hz, 4H), 7.16 (*virt. t*,  $J \cong 7.6$  Hz, 1H), 7.08 (d,  $J$  = 7.2 Hz, 1H), 6.72 (*virt. t*,  $J \cong 7.2$  Hz, 1H), 6.47 (d,  $J$  = 7.9 Hz, 1H), 5.55 (s, 1H), 4.79 – 4.62 (m, 2H), 3.73 – 3.56 (m, 1H), 3.18 (*virt. td*,  $J \cong 11.8, 5.4$  Hz, 1H), 2.83 (s, 3H), 2.43 (s, 3H), 2.08 (*virt. dt*,  $J \cong 11.8, 5.4$  Hz, 1H), 1.87 – 1.70 (m, 1H).

**<sup>13</sup>C NMR** (101 MHz, CDCl<sub>3</sub>)  $\delta$  151.3, 143.8, 138.3, 136.5, 130.7, 129.9, 128.6, 127.7, 127.4, 127.2, 124.8, 124.4, 117.9, 107.2, 94.2, 84.5, 52.8, 48.2, 47.4, 39.6, 21.7.

**IR** (KBr/cm<sup>-1</sup>) 3394.6, 3030.3, 2925.3, 2853.5, 1733.7, 1607.1, 1489.8, 1452.7, 1349.3, 1297.4, 1160.7, 1091.1, 928.1, 813.0, 738.5, 664.7.

**HRMS (ESI):** C<sub>25</sub>H<sub>27</sub>N<sub>2</sub>O<sub>3</sub>S [(M+H)<sup>+</sup>]: calcd.: 435.1737; found: 435.1739.

### 8-Benzyl-3a-ethoxy-1-tosyl-1,2,3,3a,8,8a-hexahydropyrrolo[2,3-b]indole 2o

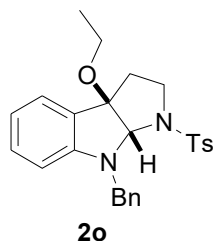

Compound **2o** was synthesized following the *general procedure*.

A white solid, 70.0 mg, 78% yield.

**m.p.:** 127 – 129 °C.

**TLC:**  $R_f$  = 0.60 (Hexane/EtOAc = 3:1) [UV, KMnO<sub>4</sub>].

**<sup>1</sup>H NMR** (400 MHz, CDCl<sub>3</sub>)  $\delta$  7.79 – 7.77 (m, 2H), 7.35 – 7.33 (m, 2H), 7.30 (*virt. t*,  $J \cong 7.9$  Hz, 4H), 7.26 (s, 1H), 7.13 (*virt. t*,  $J \cong 7.7$  Hz, 1H), 7.07 (d,  $J = 7.3$  Hz, 1H), 6.69 (*virt. t*,  $J \cong 7.2$  Hz, 1H), 6.45 (d,  $J = 7.9$  Hz, 1H), 5.54 (s, 1H), 4.68 (s, 2H), 3.69 – 3.58 (m, 1H), 3.18 (*virt. td*,  $J \cong 11.6, 5.5$  Hz, 1H), 3.05 – 2.98 (m, 1H), 2.89 – 2.77 (m, 1H), 2.43 (s, 3H), 2.10 – 2.04 (m, 1H), 1.82 – 1.74 (m, 1H), 0.94 (*virt. t*,  $J \cong 6.5$  Hz, 3H).

**<sup>13</sup>C NMR** (101 MHz, CDCl<sub>3</sub>)  $\delta$  151.0, 143.8, 138.3, 136.5, 130.5, 129.8, 128.6, 127.7, 127.5, 127.2, 125.7, 124.2, 117.9, 107.2, 93.7, 85.0, 60.7, 48.2, 47.3, 39.9, 21.6, 15.5.

**IR** (KBr/cm<sup>-1</sup>) 3393.9, 3030.1, 2956.4, 2924.1, 2853.9, 1737.3, 1606.8, 1489.2, 1451.4, 1349.6, 1161.1, 1073.6, 937.8, 813.1, 737.8, 664.5.

**HRMS (ESI):** C<sub>26</sub>H<sub>28</sub>N<sub>2</sub>NaO<sub>3</sub>S [(M+Na)<sup>+</sup>]: calcd.: 471.1713; found: 471.1716.

### 8-Benzyl-3a-isopropoxy-1-tosyl-1,2,3,3a,8,8a-hexahydropyrrolo[2,3-b]indole 2p

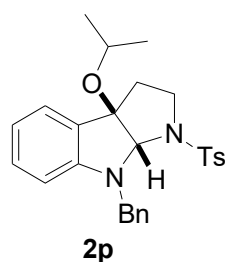

Compound **2p** was synthesized following the *general procedure*.

A pink liquid, 49.1 mg, 53% yield.

**TLC:**  $R_f$  = 0.59 (Hexane/EtOAc = 3:1) [UV, KMnO<sub>4</sub>].

**<sup>1</sup>H NMR** (400 MHz, CDCl<sub>3</sub>)  $\delta$  7.79 – 7.77 (m, 2H), 7.35 – 7.33 (m, 2H), 7.34 – 7.26 (m, 5H), 7.19 – 7.09 (m, 2H), 6.69 (*virt. t*,  $J \cong 7.3$  Hz, 1H), 6.50 (d,  $J = 8.1$  Hz, 1H), 5.47 (s, 1H), 4.69 (dd,  $J = 41.5, 16.2$  Hz, 2H), 3.62 (dd,  $J = 12.2, 7.7$  Hz, 1H), 3.22 – 3.15 (m, 1H), 3.06 (*virt. td*,  $J \cong 12.5, 5.1$  Hz, 1H), 2.43 (s, 3H), 2.05 (dd,  $J = 12.0, 4.7$  Hz, 1H), 1.73 – 1.67 (m, 1H), 0.86 – 0.77 (m, 3H).

$^{13}\text{C}$  NMR (101 MHz,  $\text{CDCl}_3$ )  $\delta$  151.4, 143.8, 138.4, 136.7, 130.6, 129.9, 128.6, 127.8, 127.4, 127.2, 126.4, 124.9, 117.7, 107.0, 93.5, 85.4, 67.7, 47.9, 46.9, 40.3, 24.3, 23.8, 21.7.

IR ( $\text{KBr}/\text{cm}^{-1}$ ) 3030.0, 2960.2, 2925.3, 1729.4, 1604.2, 1488.4, 1460.8, 1346.0, 1308.6, 1246.6, 1159.9, 1054.8, 946.9, 813.2, 747.8, 699.9.

HRMS (ESI):  $\text{C}_{27}\text{H}_{30}\text{N}_2\text{NaO}_4\text{S}$  [(M+Na) $^+$ ]: calcd.: 485.1869; found: 485.1872.

**8-Benzyl-3a-butoxy-1-tosyl-1,2,3,3a,8,8a-hexahydropyrrolo[2,3-*b*]indole 2q**

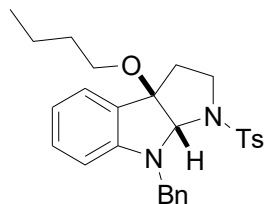

**2q**

Compound **2q** was synthesized following the *general procedure*.

A yellow liquid, 66.7 mg, 70% yield.

TLC:  $R_f$  = 0.61 (Hexane/EtOAc = 3:1) [UV,  $\text{KMnO}_4$ ].

$^1\text{H}$  NMR (400 MHz,  $\text{CDCl}_3$ )  $\delta$  7.79 – 7.77 (m, 2H), 7.41 – 7.34 (m, 2H), 7.32 – 7.27 (m, 4H), 7.26 – 7.23 (m, 1H), 7.14 (*virt. td*,  $J \cong 8.0, 1.3$  Hz, 1H), 7.10 – 7.02 (m, 1H), 6.69 (*virt. td*,  $J \cong 8.3, 1.3$  Hz, 1H), 6.47 (d,  $J = 8.0$  Hz, 1H), 5.48 (s, 1H), 4.73 – 4.64 (m, 2H), 3.67 – 3.61 (m, 1H), 3.18 (*virt. td*,  $J \cong 11.9, 5.6$  Hz, 1H), 2.93 (*virt. dt*,  $J \cong 8.8, 6.5$  Hz, 1H), 2.70 (*virt. dt*,  $J \cong 8.8, 6.5$  Hz, 1H), 2.43 (s, 3H), 2.12 – 2.06 (m, 2H), 1.75 (*virt. td*,  $J \cong 11.9, 7.8$  Hz, 1H), 1.31 – 1.20 (m, 3H), 1.18 – 1.08 (m, 2H), 0.80 (t,  $J = 7.3$  Hz, 3H).

$^{13}\text{C}$  NMR (101 MHz,  $\text{CDCl}_3$ )  $\delta$  151.1, 143.7, 138.3, 136.5, 130.5, 129.8, 128.6, 127.7, 127.4, 127.2, 125.7, 124.3, 117.8, 107.1, 93.6, 84.8, 65.0, 48.1, 47.4, 39.8, 32.0, 21.6, 19.3, 13.9.

IR ( $\text{KBr}/\text{cm}^{-1}$ ) 3391.8, 3030.4, 2956.9, 2925.9, 2869.3, 1607.3, 1489.6, 1462.0, 1349.9, 1161.5, 1088.0, 1048.7, 934.3, 813.0, 738.1, 664.2.

HRMS (ESI):  $\text{C}_{28}\text{H}_{33}\text{N}_2\text{O}_3\text{S}$  [(M+H) $^+$ ]: calcd.: 477.2206; found: 477.2214.

**8-benzyl-3a-(hexyloxy)-1-tosyl-1,2,3,3a,8,8a-hexahydropyrrolo[2,3-*b*]indole 2r**

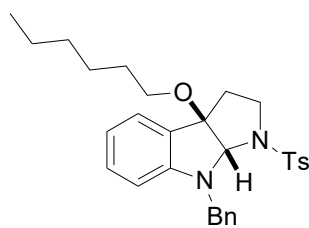

**2r**

Compound **2r** was synthesized following the *general procedure*.

A yellow liquid, 67.6 mg, 67% yield.

TLC:  $R_f$  = 0.63 (Hexane/EtOAc = 3:1) [UV,  $\text{KMnO}_4$ ].

$^1\text{H}$  NMR (400 MHz,  $\text{CDCl}_3$ )  $\delta$  7.79 – 7.77 (m, 2H), 7.41 – 7.35 (m, 2H), 7.34 – 7.27 (m, 4H), 7.25 – 7.22 (m, 1H), 7.15 (td,  $J = 7.9, 1.3$  Hz, 1H), 7.10 – 7.02 (m, 1H), 6.70 (td,  $J = 7.9, 1.3$  Hz, 1H), 6.47 (d,  $J = 8.3$  Hz, 1H), 5.49 (s, 1H), 4.75 – 4.64 (m, 2H), 3.67 – 3.60 (m, 1H), 3.18 (*virt. td*,  $J \cong 11.9, 5.6$  Hz, 1H), 2.92 (*virt. dt*,  $J \cong 8.8, 6.4$  Hz, 1H), 2.70 (dt,  $J = 8.8, 6.7$  Hz, 1H), 2.43 (s, 3H), 2.10 – 2.04 (m, 1H), 1.79 – 1.71 (m, 1H), 1.31 – 1.24 (m, 4H), 1.19 – 1.06 (m, 4H), 0.88 (t,  $J = 7.2$  Hz, 3H).

$^{13}\text{C}$  NMR (101 MHz,  $\text{CDCl}_3$ )  $\delta$  151.1, 143.7, 138.3, 136.5, 130.5, 129.8, 128.6, 127.7, 127.4, 127.2, 125.7, 124.3, 117.8, 107.1, 93.6, 84.8, 65.4, 48.1, 47.3, 39.8, 31.7, 29.9, 25.8, 22.7, 21.6, 14.2.

IR ( $\text{KBr}/\text{cm}^{-1}$ ) 3059.1, 3030.5, 2927.1, 2857.7, 1739.4, 1607.6, 1489.7, 1462.0, 1350.7, 1161.7, 1090.1, 937.3, 812.7, 739.5, 664.2.

HRMS (ESI):  $\text{C}_{30}\text{H}_{36}\text{N}_2\text{NaO}_3\text{S}$  [(M+Na) $^+$ ]: calcd.: 527.2339; found: 527.2340.

**8-benzyl-3a-methoxy-3,3a,8,8a-tetrahydro-2H-furo[2,3-*b*]indole 4**

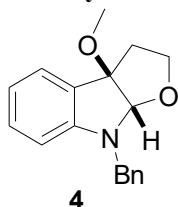

Compound **4** was synthesized following the *general procedure*.

A white solid, 36.6 mg, 65% yield.

m.p.: 72 – 74 °C.

TLC:  $R_f$  = 0.88 (Hexane/EtOAc = 3:1) [UV,  $\text{KMnO}_4$ ].

$^1\text{H}$  NMR (400 MHz,  $\text{CDCl}_3$ )  $\delta$  7.36 – 7.28 (m, 4H), 7.26 – 7.20 (m, 2H), 7.14 (*virt. t*,  $J \cong 7.5$  Hz, 1H), 6.75 (t,  $J = 7.5$  Hz, 1H), 6.41 (d,  $J = 7.9$  Hz, 1H), 5.43 (s, 1H), 4.58 – 4.44 (m, 2H), 4.05 (*virt. t*,  $J \cong 7.9$  Hz, 1H), 3.68 – 3.60 (m, 1H), 3.09 (s, 3H), 2.47 (*virt. td*,  $J \cong 11.6, 7.7$  Hz, 1H), 2.30 (dd,  $J = 11.8, 4.2$  Hz, 1H).  $^{13}\text{C}$  NMR (101 MHz,  $\text{CDCl}_3$ )  $\delta$  151.6, 138.2, 130.3, 128.6, 127.4, 127.2, 126.2, 124.7, 117.9, 106.2, 98.6, 93.6, 66.9, 53.2, 48.6, 41.0.

IR ( $\text{KBr}/\text{cm}^{-1}$ ) 3029.3, 2932.9, 2870.9, 1735.5, 1607.8, 1490.3, 1458.8, 1358.8, 1316.8, 1130.9, 1112.4, 1057.4, 944.8, 742.8, 699.3.

HRMS (ESI):  $\text{C}_{18}\text{H}_{20}\text{NO}_2$  [(M+H) $^+$ ]: calcd.: 282.1489; found: 282.1491.

**8-Benzyl-3a-methoxy-3,3a,8,8a-tetrahydro-2H-furo[2,3-*b*]indol-2-one 6**

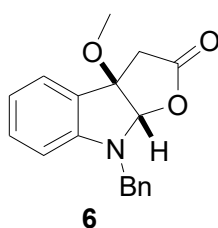

Compound **6** was synthesized following the *general procedure*.

A liquid, 20.1 mg, 34% yield.

TLC:  $R_f$  = 0.83 (Hexane/EtOAc = 3:1) [UV,  $\text{KMnO}_4$ ].

$^1\text{H}$  NMR (400 MHz,  $\text{CDCl}_3$ )  $\delta$  7.61 (d,  $J = 7.6$  Hz, 1H), 7.30 – 7.22 (m, 4H), 7.21 – 7.07 (m, 5H), 5.26 (s, 2H), 3.77 (s, 2H), 3.69 (s, 3H).

$^{13}\text{C}$  NMR (101 MHz,  $\text{CDCl}_3$ )  $\delta$  172.5, 137.5, 136.6, 128.8, 128.0, 127.7, 127.2, 126.9, 122.1, 119.5, 119.2, 109.8, 107.6, 52.0, 50.1, 31.2.

IR ( $\text{KBr}/\text{cm}^{-1}$ ) 3029.8, 2952.2, 2925.0, 1737.5, 1613.8, 1466.3, 1356.6, 1334.3, 1255.7, 1160.6, 1012.7, 740.6, 700.8.

HRMS (ESI):  $\text{C}_{18}\text{H}_{17}\text{NNaO}_3$  [(M+Na) $^+$ ]: calcd.: 318.1101; found: 318.1104.

## D. Scale-up Reaction and Synthesis of CPC-1

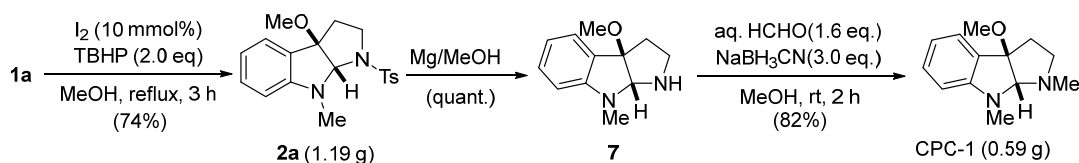

A 500 mL round bottom flask was charged with I<sub>2</sub> (114.3 mg, 10 mol %), substrate **1** (4.5 mmol, 1.49 g, 1.0 equiv) and methanol (250 mL), then TBHP (70% in water, 1.16 mL, 9.0 mmol, 2.0 equiv) was slowly added. The reaction mixture was heat to reflux for 3 h before cooled down to room temperature. Saturated aqueous Na<sub>2</sub>S<sub>2</sub>O<sub>3</sub> (100 mL) solution was slowly introduced and the resulting mixture was extracted with EtOAc (3 × 100 mL). The combined organic layers were dried over Na<sub>2</sub>SO<sub>4</sub>, filtered, concentrated under reduced pressure and the residue was purified by chromatography on silica gel (eluent: Hexane/EtOAc, 30:1 to 10:1) to afford adduct **2a** (1.19 g, 74%).

To a solution of compound **2a** (1.19 g, 3.30 mmol) in anhydrous MeOH (200 mL) was added activated Mg (3.96 g, 165 mmol). Then the reaction mixture was vigorously stirred at ambient temperature for 24 h and then filtered over celite. The filtrate was concentrated in vacuum to give intermediate **7** in quantitative yield. This intermediate was dissolved in MeOH (40 mL) was added formaldehyde (37% water solution, 0.43 mL) at 0 °C. The reaction mixture was stirred for 5 h at room temperature. Then, NaBH<sub>3</sub>CN (621.7 mg, 9.9 mmol) was added and the reaction was stirred for 2 h at room temperature. Then the reaction mixture was quenched with H<sub>2</sub>O (50 mL), and extracted with EtOAc. The organic layers were combined and dried over Na<sub>2</sub>SO<sub>4</sub>, filtered, concentrated in vacuum. The residue was purified by chromatography on silica gel (eluent: Hexane/EtOAc, 20:1 to 5:1) to afford CPC-1 as an oil (0.59 g, 82%).

**TLC:** *R*<sub>f</sub> = 0.24 (DCM/MeOH = 20:1) [UV, KMnO<sub>4</sub>].

**<sup>1</sup>H NMR** (600 MHz, CDCl<sub>3</sub>) δ 7.24 – 7.16 (m, 2H), 6.74 (*virt. td*, *J* ≅ 7.4, 1.0 Hz, 1H), 6.45 (d, *J* = 7.9 Hz, 1H), 4.84 (s, 1H), 3.24 – 3.15 (m, 1H), 3.11 (s, 3H), 2.92 (s, 3H), 2.84 – 2.76 (m, 1H), 2.63 – 2.60 (m, 1H), 2.58 (s, 3H), 2.20 – 2.16 (m, 1H).

**<sup>13</sup>C NMR** (101 MHz, CDCl<sub>3</sub>) δ 153.11, 129.80, 127.98, 124.10, 118.04, 107.87, 94.03, 91.71, 52.52, 52.45, 39.29, 38.60, 36.32.

The spectra data are matched with those reported<sup>2</sup>.

<sup>2</sup> Q. Ren, J. Huang, L. Wang, W. Li, H. Liu, X. Jiang, J. Wang, *ACS Catal.* **2012**, *2*, 2622.

## E. X-Ray crystallographic analysis of **2a**

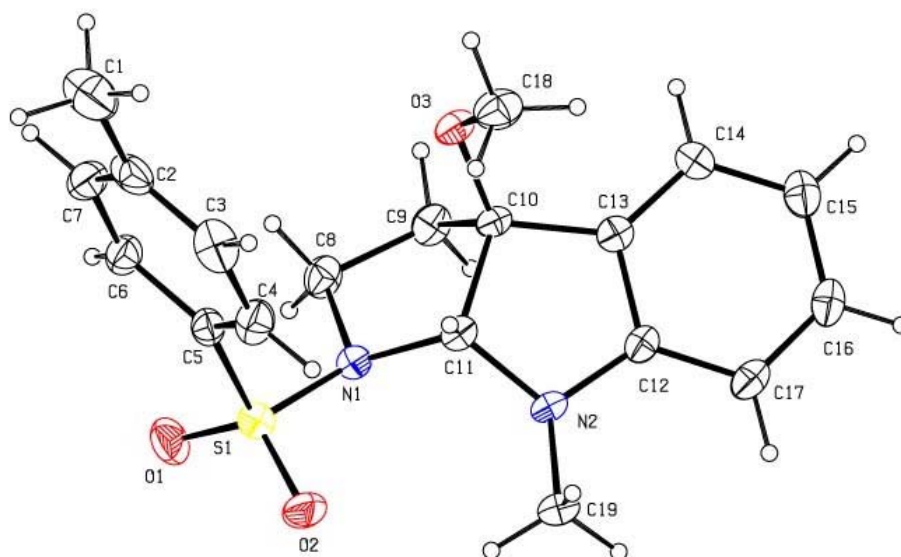

Table 1 Crystal data and structure refinement for T.

Identification code T

Empirical formula C<sub>19</sub>H<sub>22</sub>N<sub>2</sub>O<sub>3</sub>S

Formula weight 358.44

Temperature/K 296(2)

Crystal system monoclinic

Space group P2<sub>1</sub>/c

a/Å 19.181(6)

b/Å 7.746(3)

c/Å 12.126(4)

α/° 90

β/° 91.846(8)

γ/° 90

Volume/Å<sup>3</sup> 1800.7(11)

Z 4

ρ<sub>calc</sub>/cm<sup>3</sup> 1.322

μ/mm<sup>-1</sup> 0.200

F(000) 760.0

Crystal size/mm<sup>3</sup> 0.2 × 0.1 × 0.1

Radiation MoK $\alpha$  ( $\lambda = 0.71073$ )  
2 $\Theta$  range for data collection / $^\circ$  2.124 to 52.466  
Index ranges  $-23 \leq h \leq 21$ ,  $-9 \leq k \leq 9$ ,  $-15 \leq l \leq 10$   
Reflections collected 13043  
Independent reflections 3282 [Rint = 0.0634, Rsigma = 0.0777]  
Data/restraints/parameters 3282/0/310  
Goodness-of-fit on F2 1.018  
Final R indexes [ $I \geq 2\sigma(I)$ ] R1 = 0.0799, wR2 = 0.1827  
Final R indexes [all data] R1 = 0.1509, wR2 = 0.2228  
Largest diff. peak/hole / e  $\text{\AA}^{-3}$  1.35/-0.32

## F. Mechanistic study

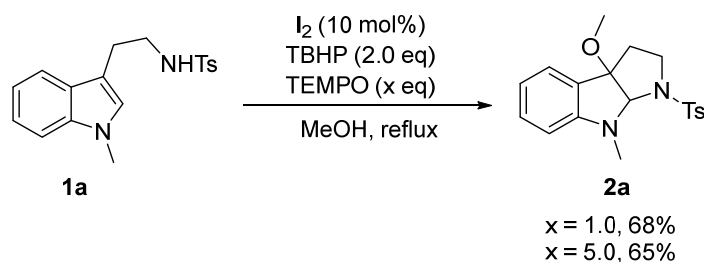

A 50 mL round bottom flask was charged with  $I_2$  (5.1 mg, 10 mol %), tryptamine **1a** (0.2 mmol, 65.6 mg, 1.0 equiv) and MeOH (12 mL), then TBHP (70% in water, 57.2  $\mu$ L, 0.4 mmol, 2.0 equiv) and TEMPO (0.2 mmol, 31.2 mg) was added. The reaction mixture was heat to reflux for 3 h before cooled down to room temperature. Saturated aqueous  $Na_2S_2O_3$  (10 mL) solution was slowly introduced and the resulting mixture was extracted with EtOAc ( $3 \times 10$  mL). The combined organic layers were dried over  $Na_2SO_4$ , filtered, concentrated under reduced pressure and the residue was purified by chromatography on silica gel (eluent: Hexane/EtOAc, 30:1 to 10:1) to afford methoxytryptamine **2a** (48.8 mg, 68% yield)

When TEMPO (1.0 mmol, 156 mg) was used by following the same protocol described above, the product **2a** was isolated in 65% yield (46.5 mg). These outcomes rule out the possibility of a radical process.



## G. $^1\text{H}$ and $^{13}\text{C}$ NMR spectra data of all products

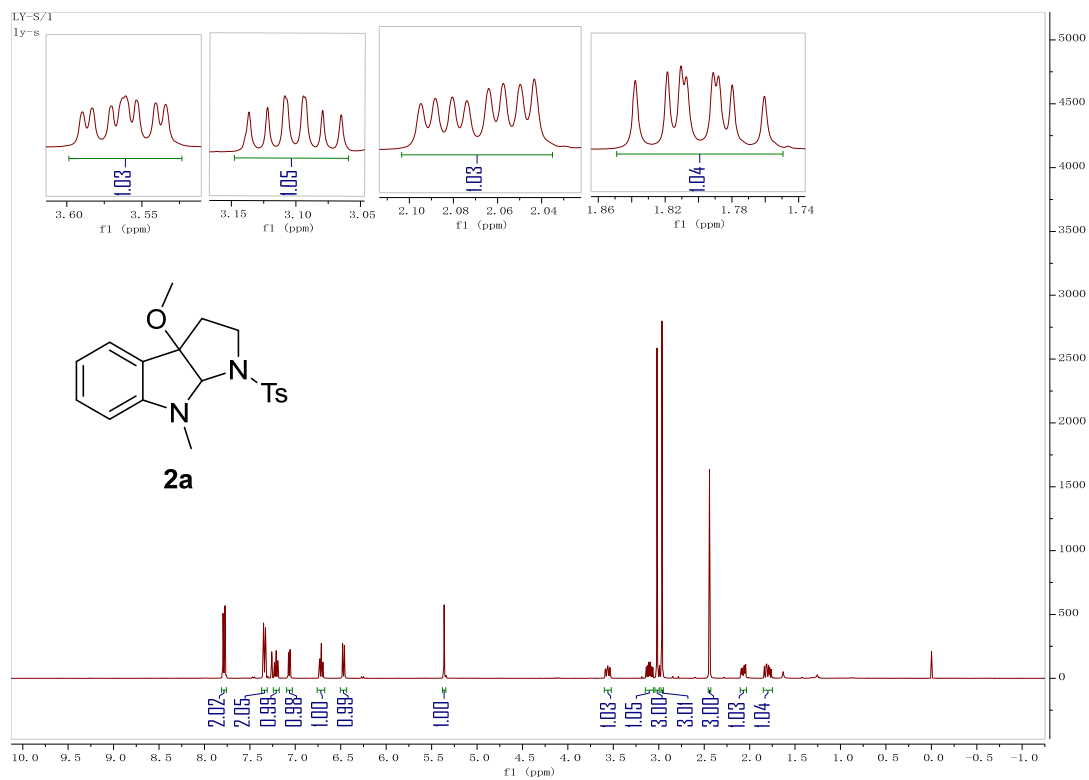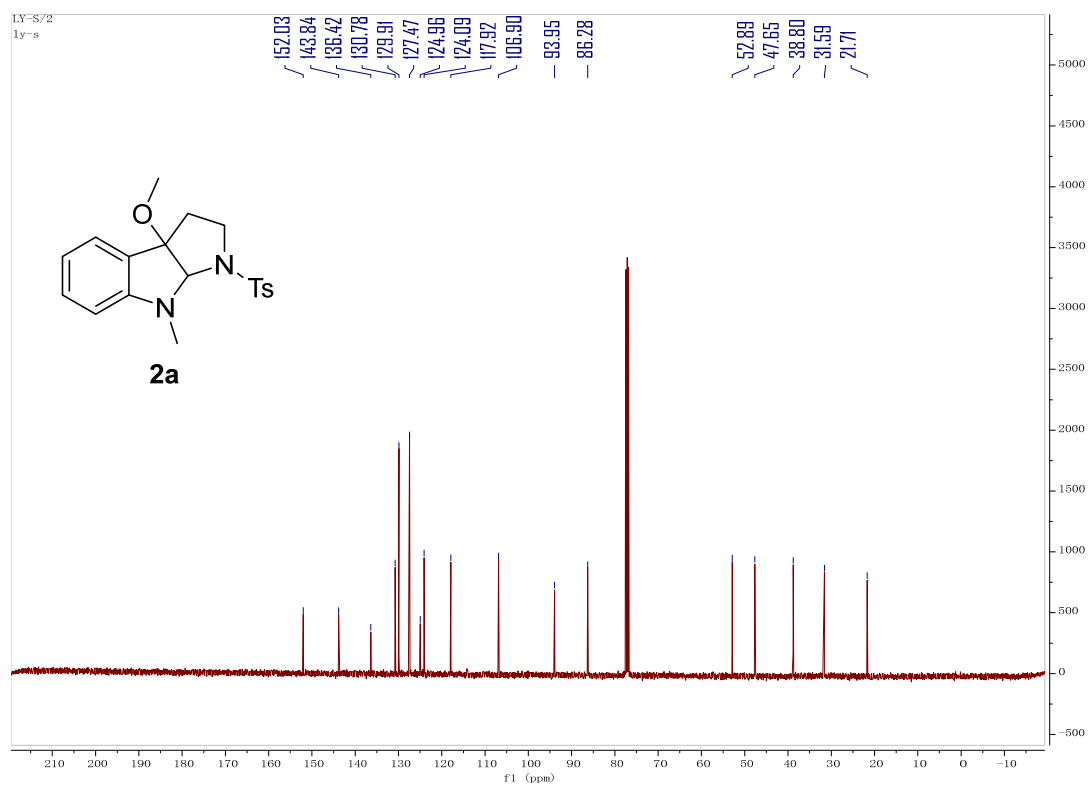

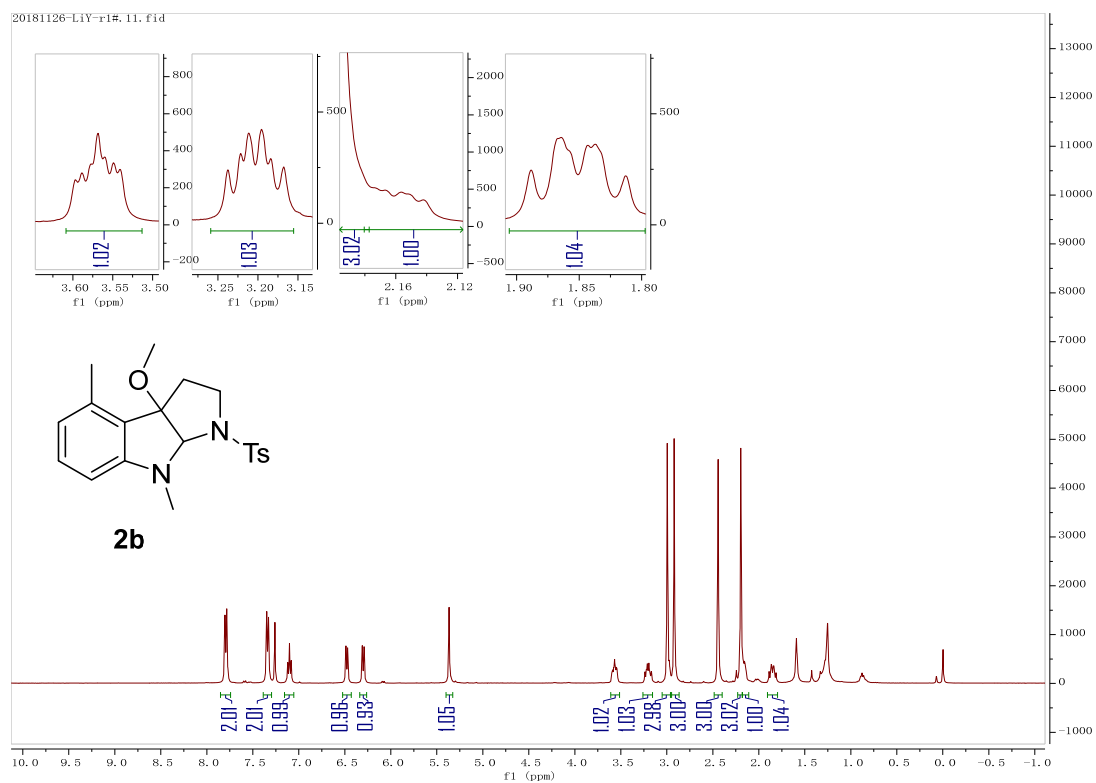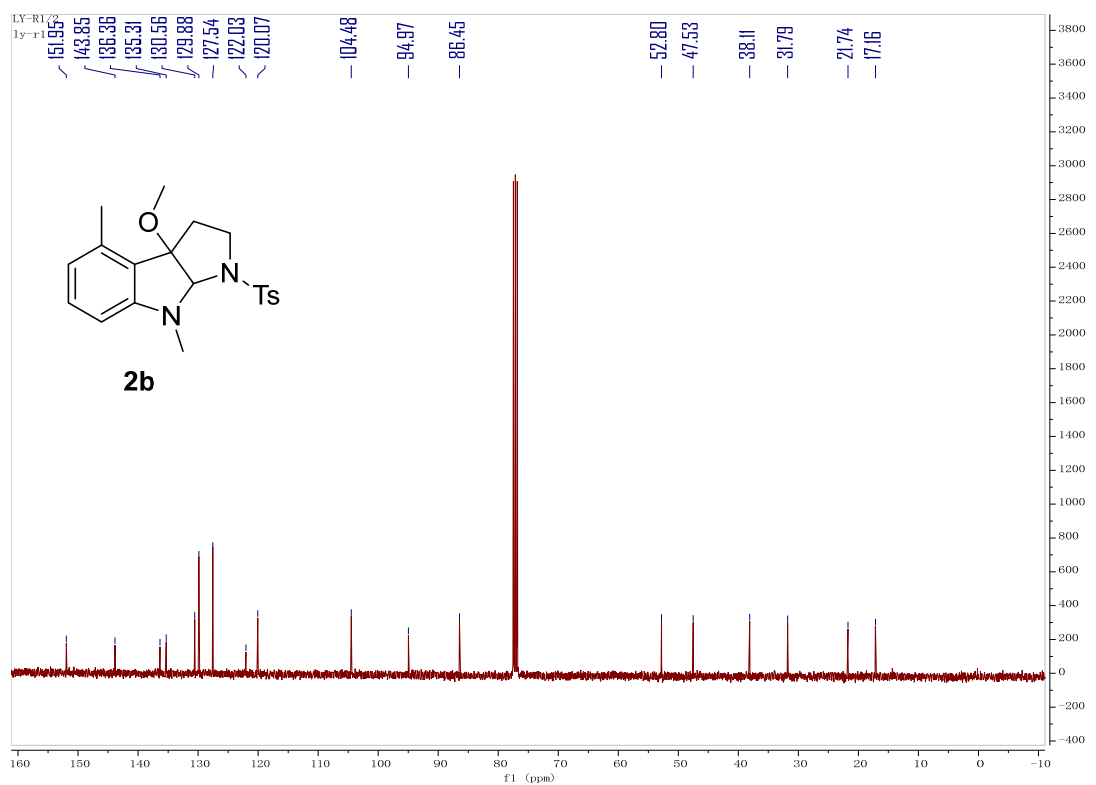

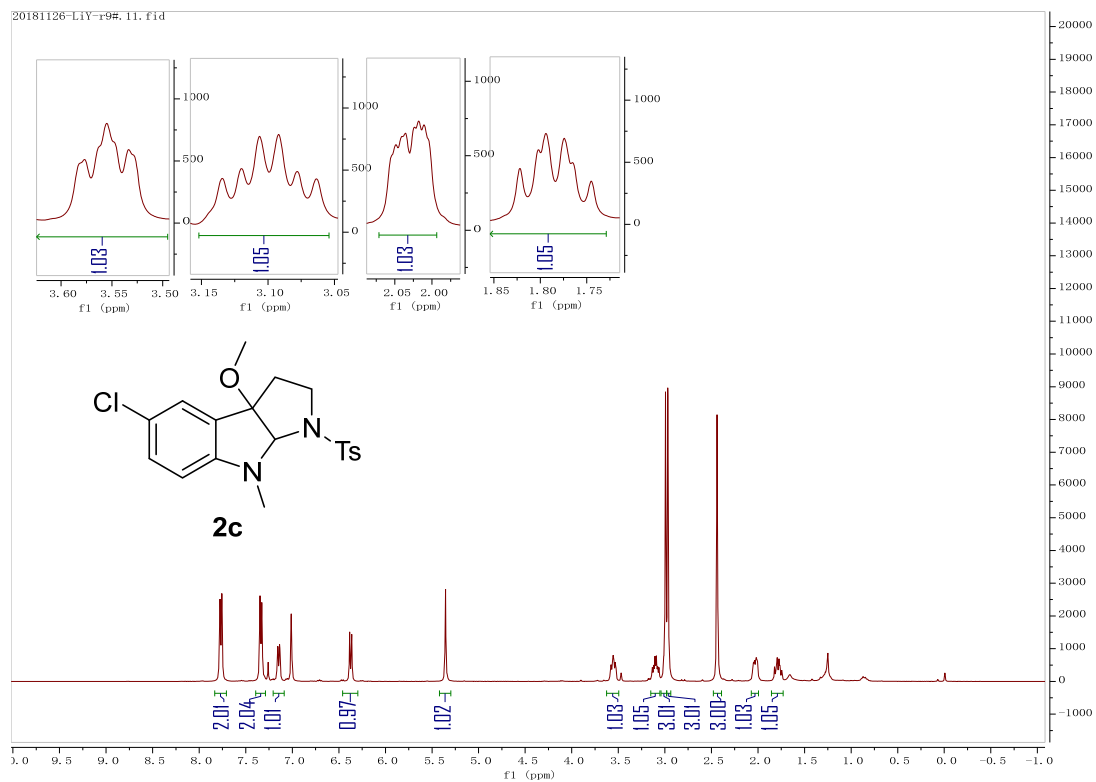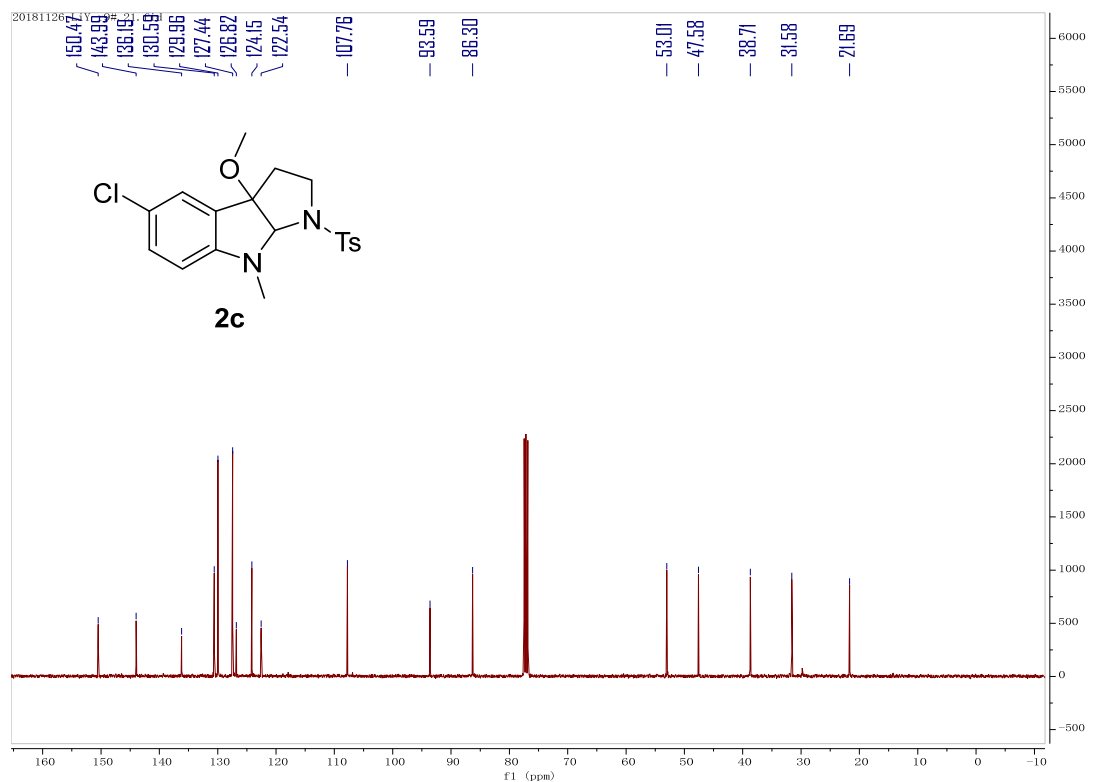

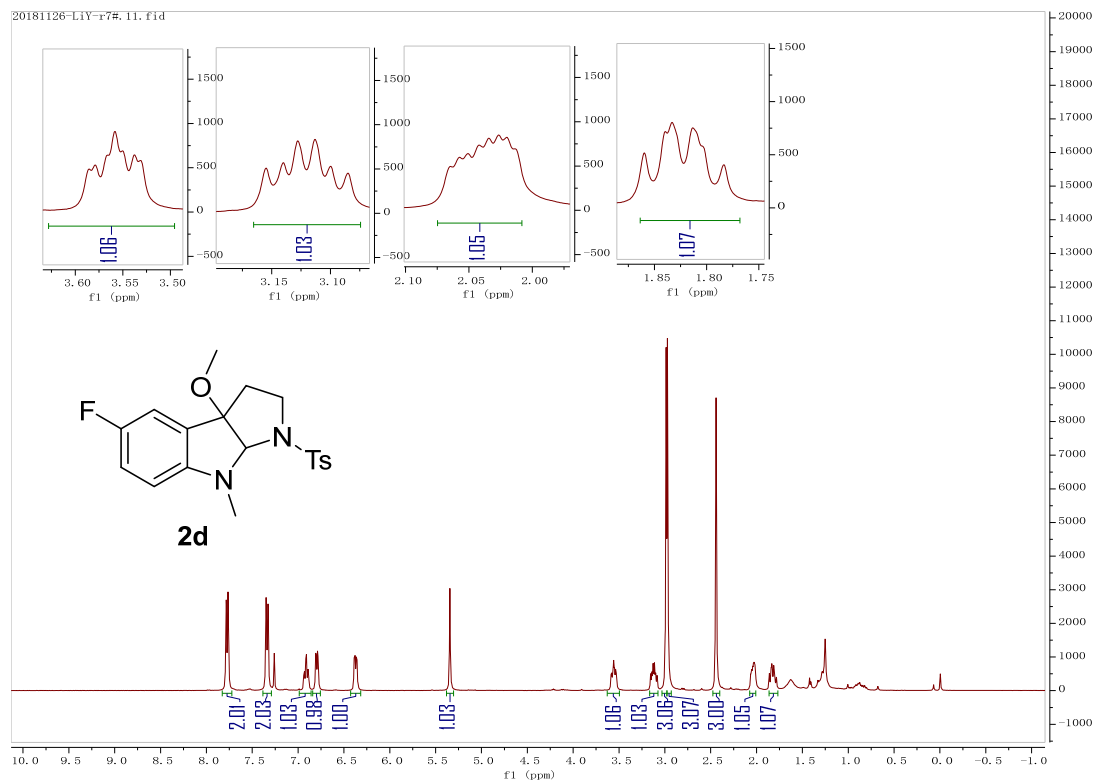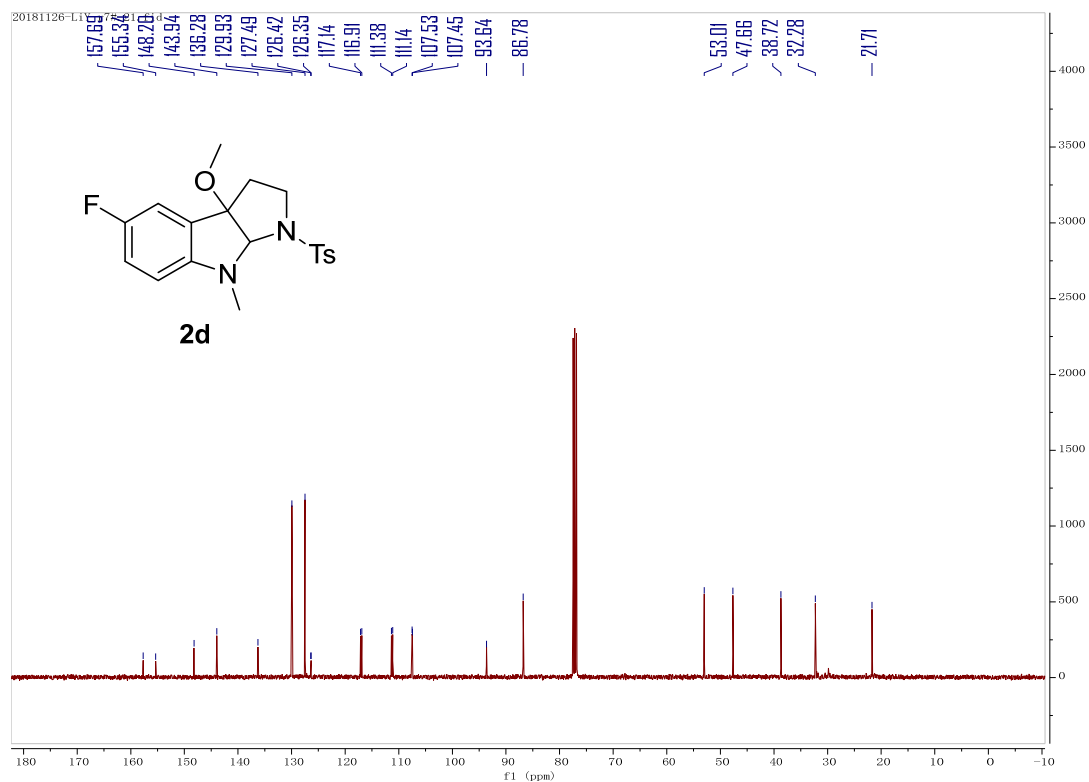

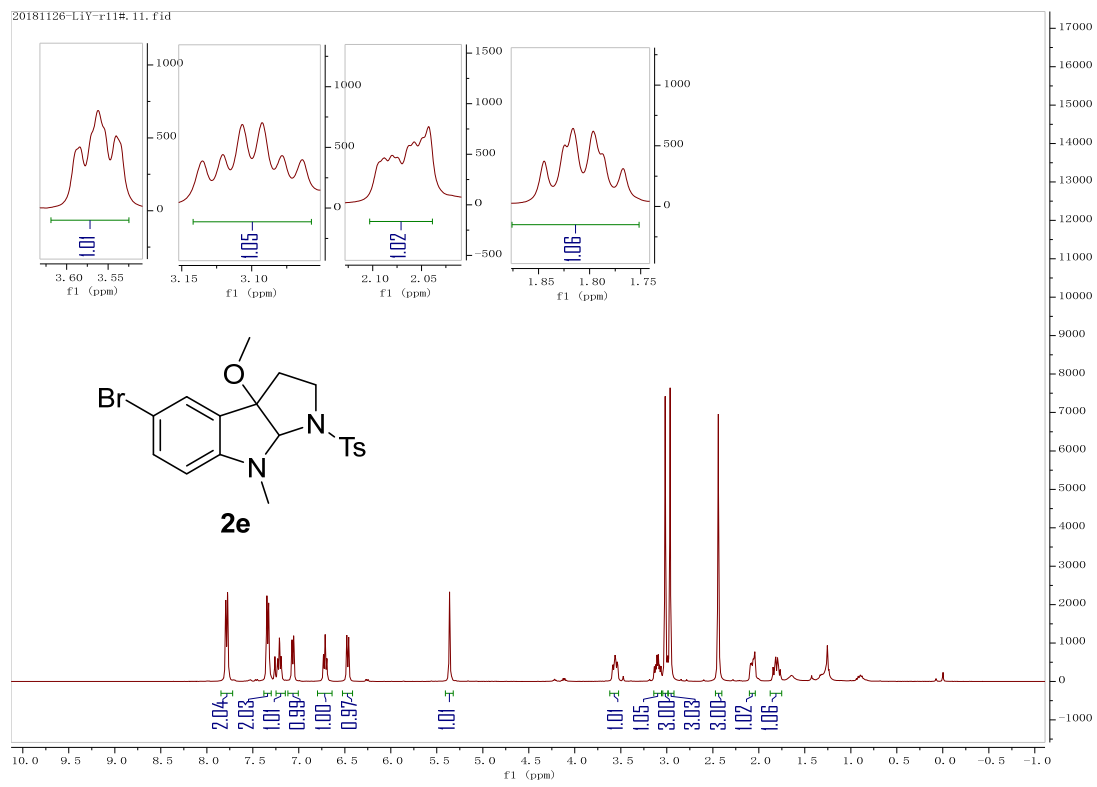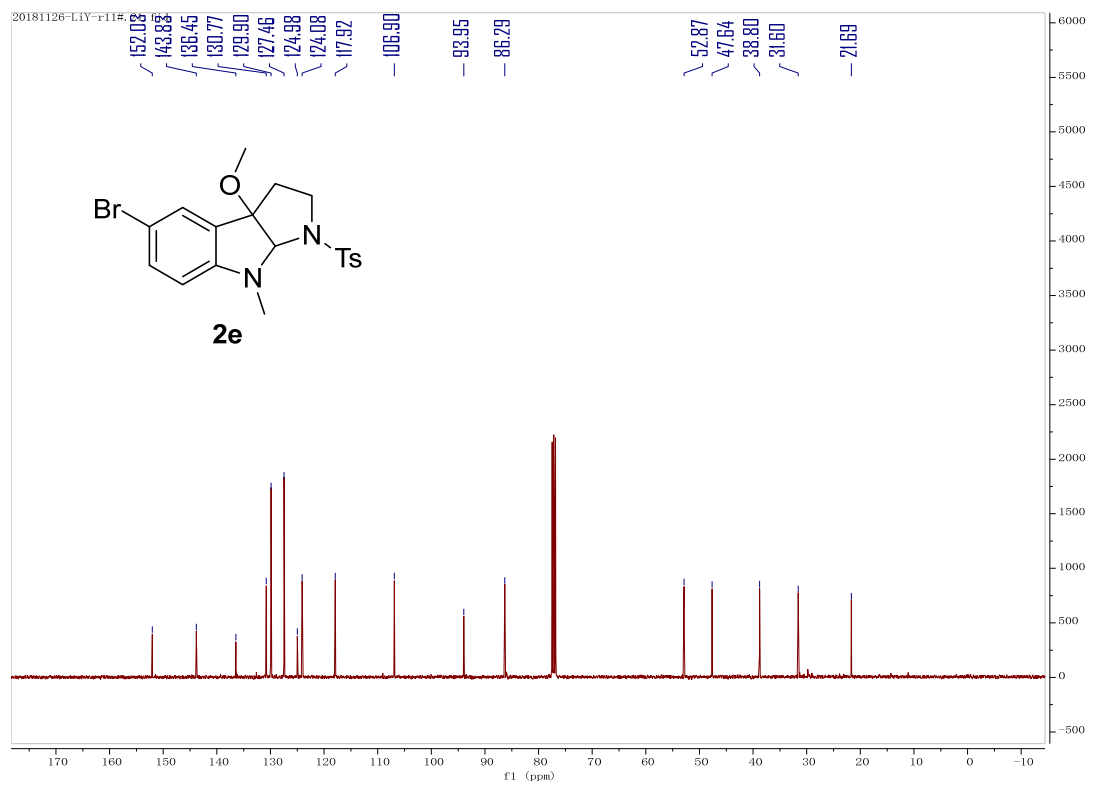

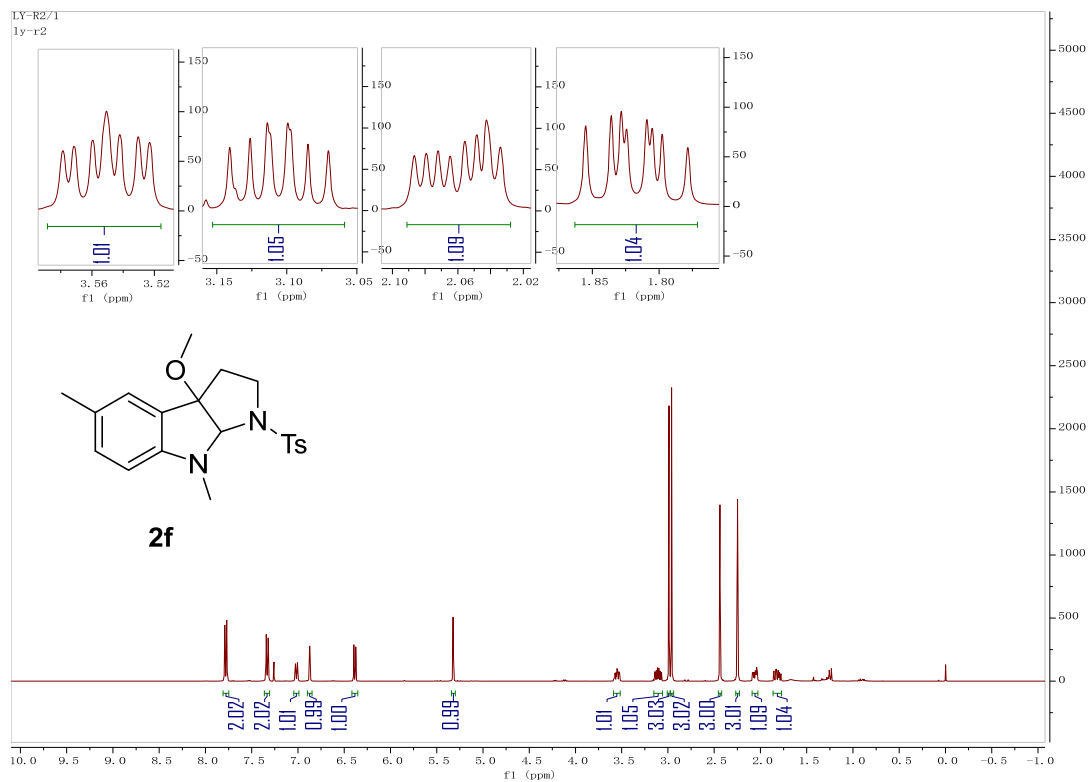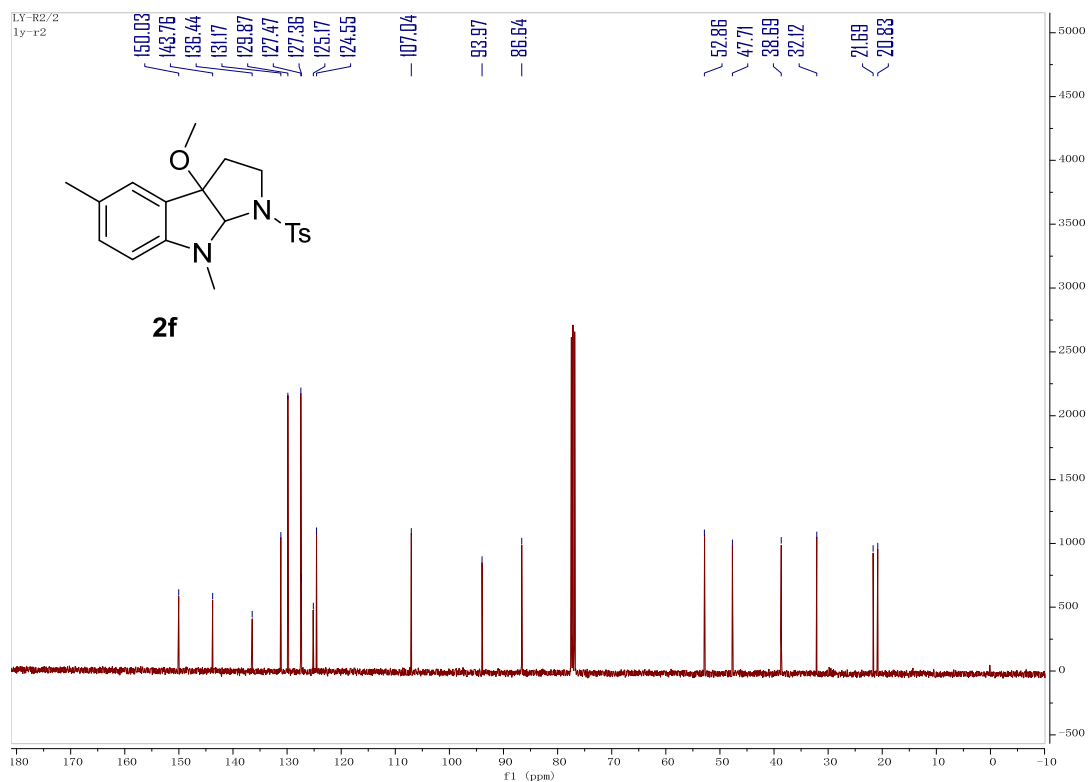

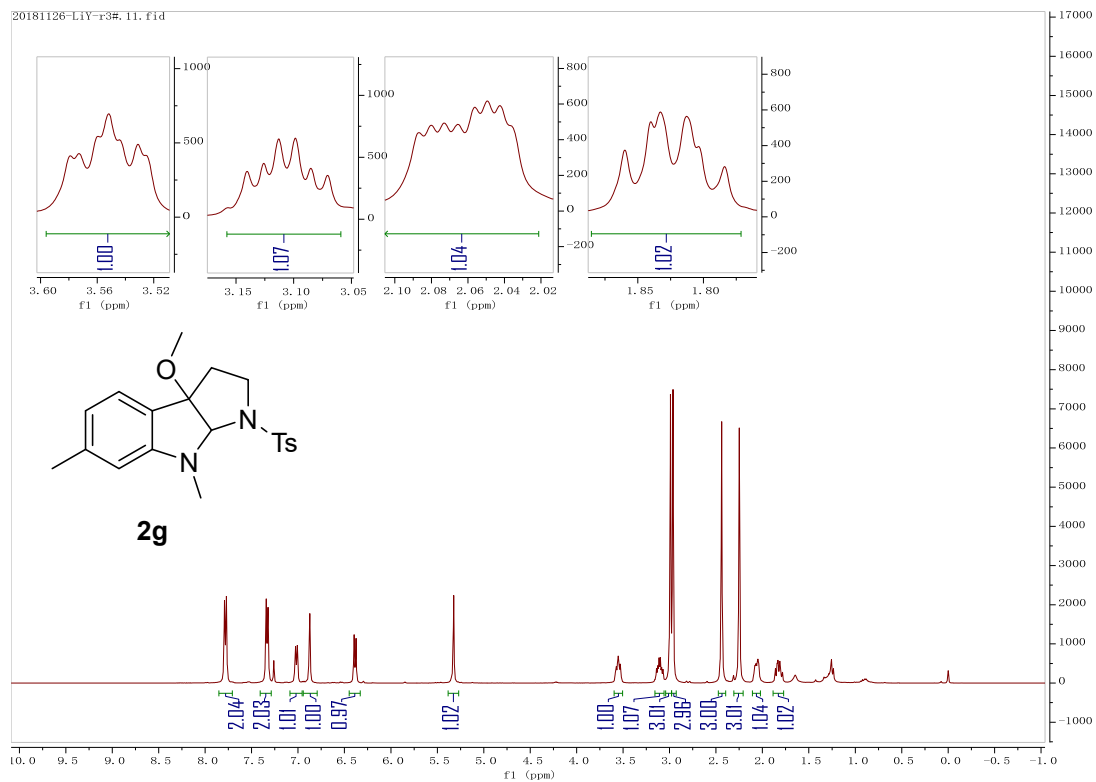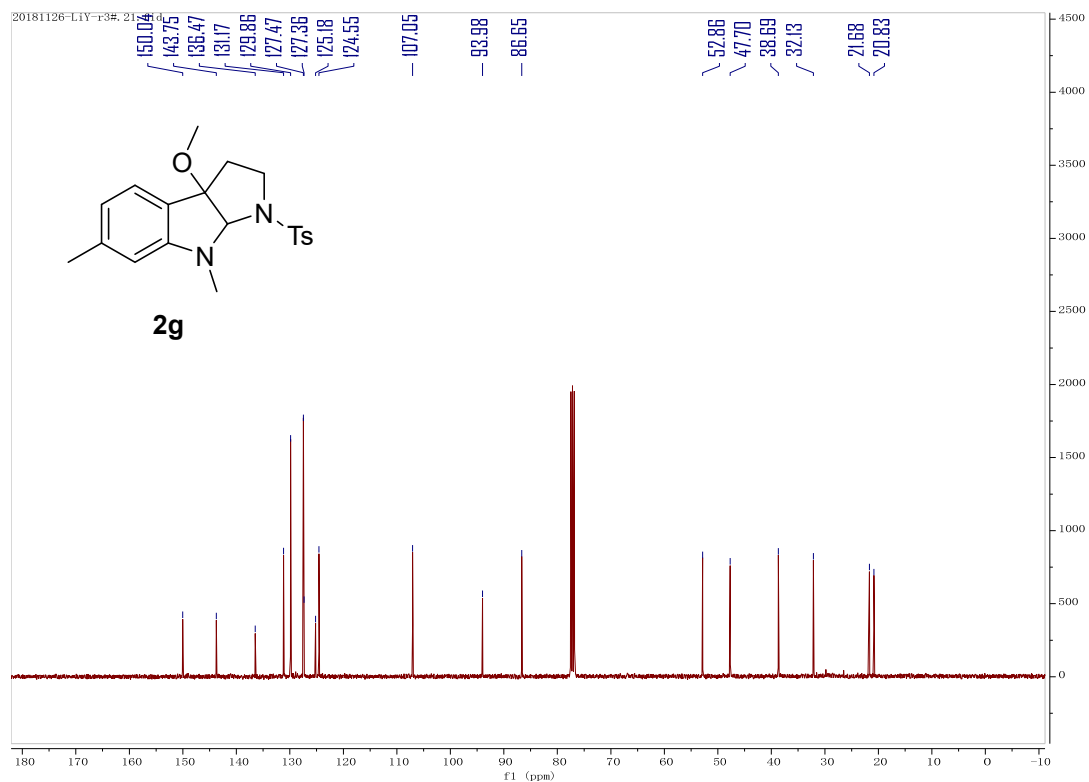

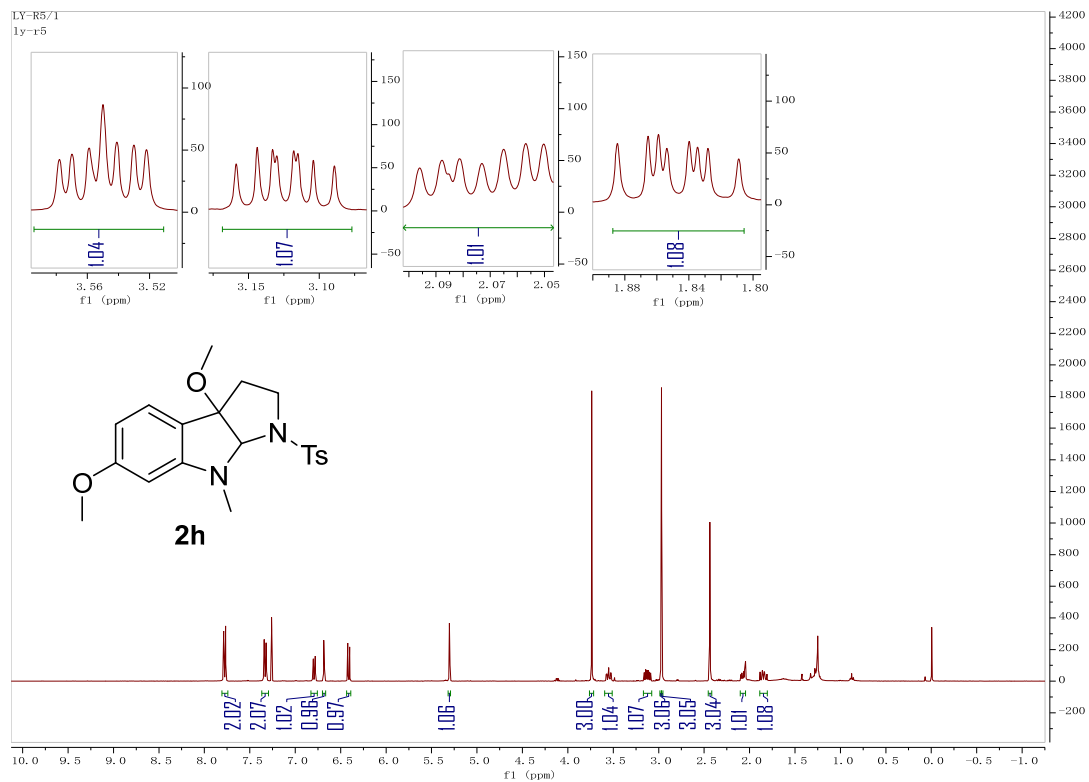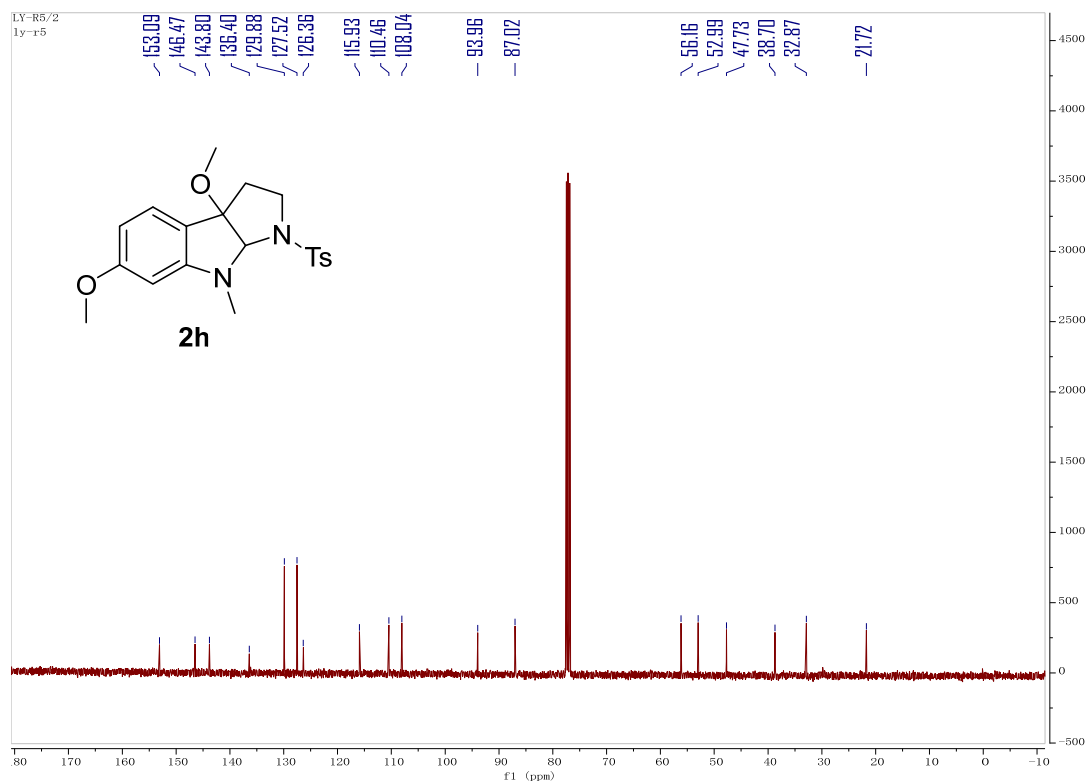



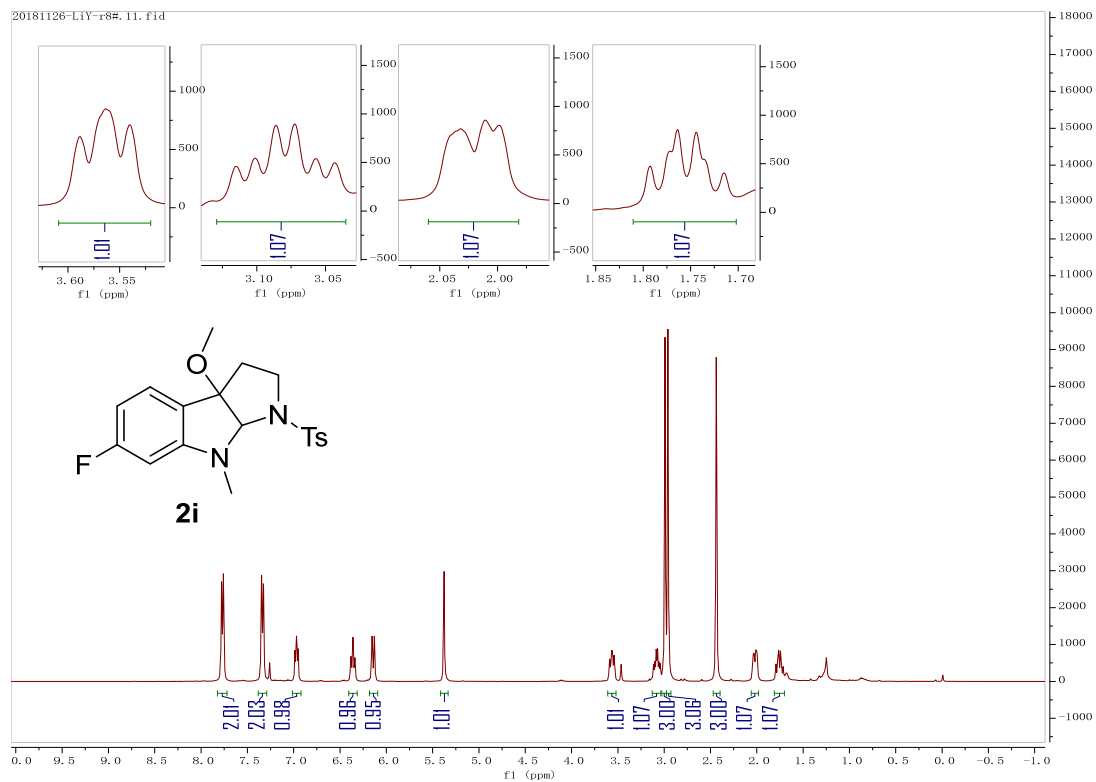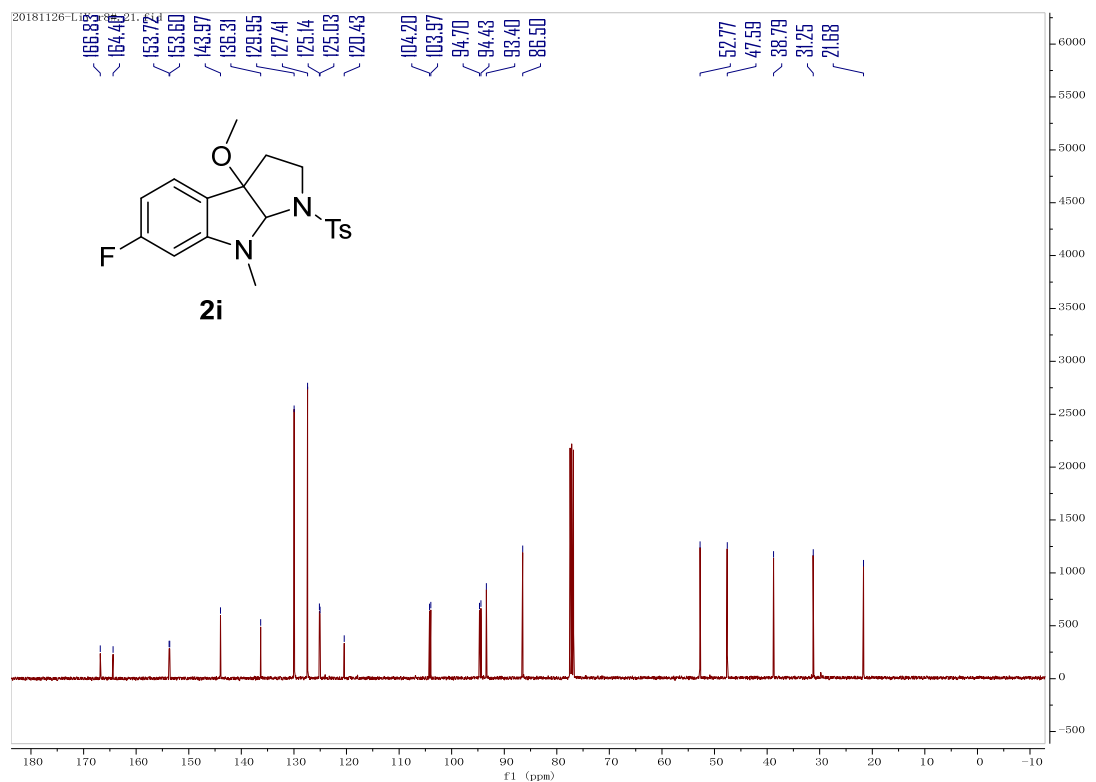

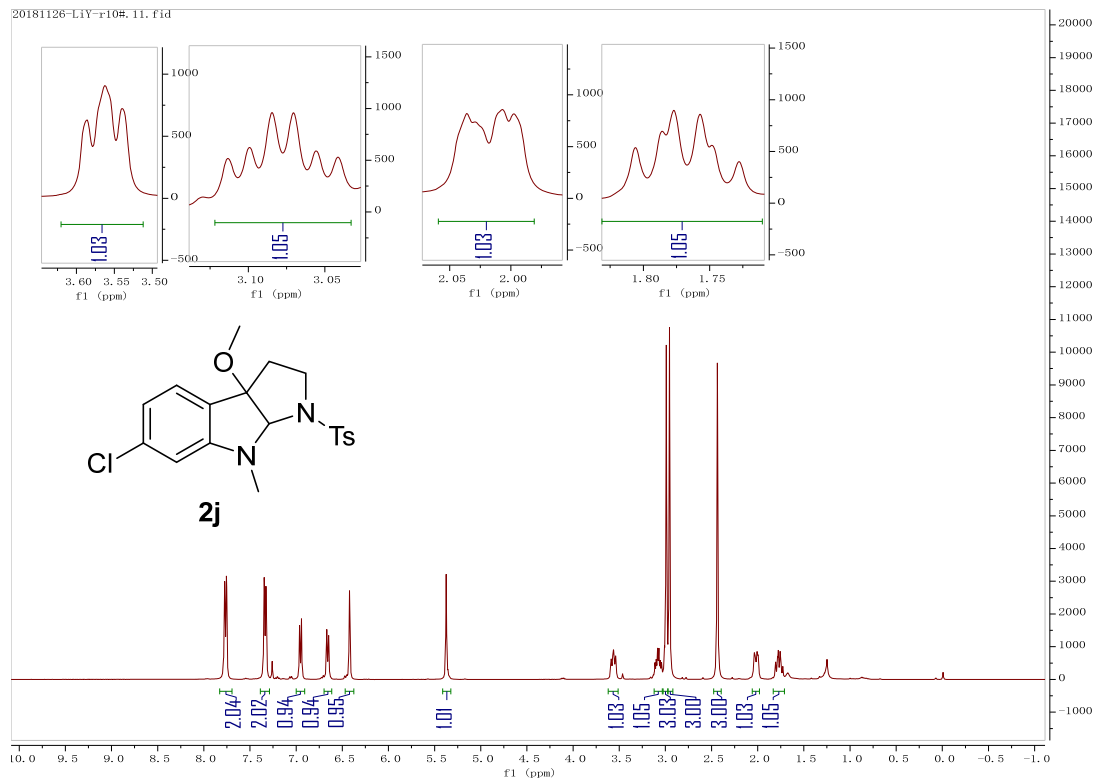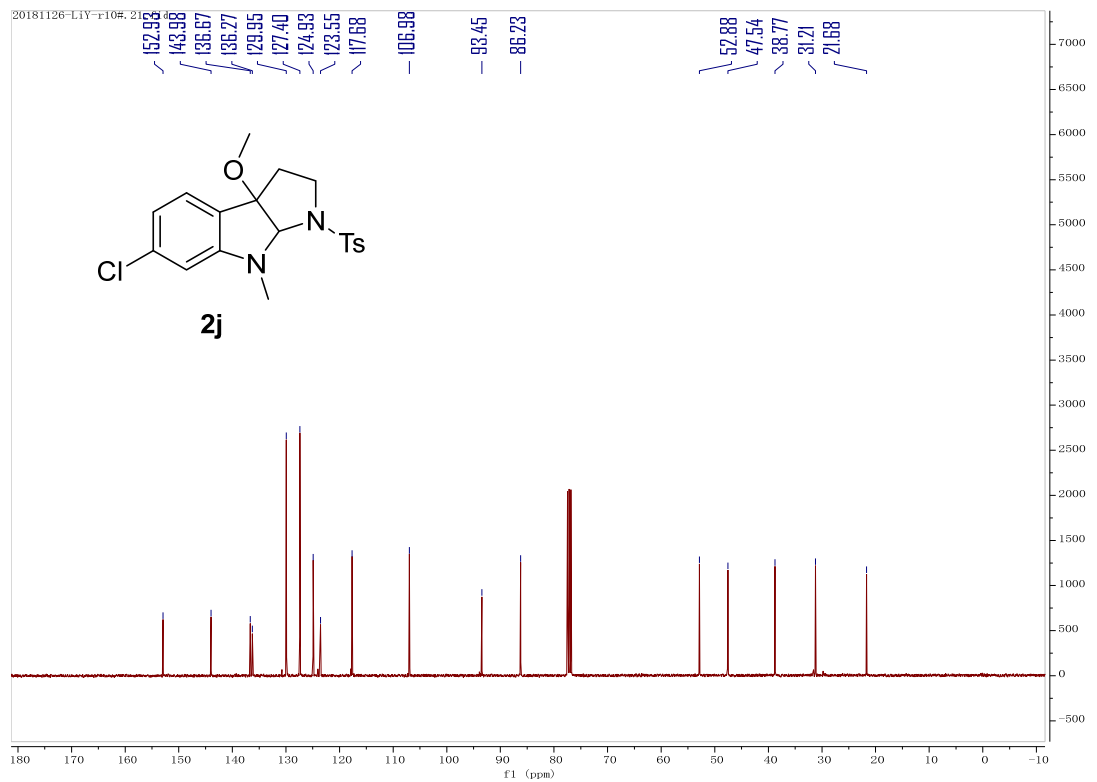

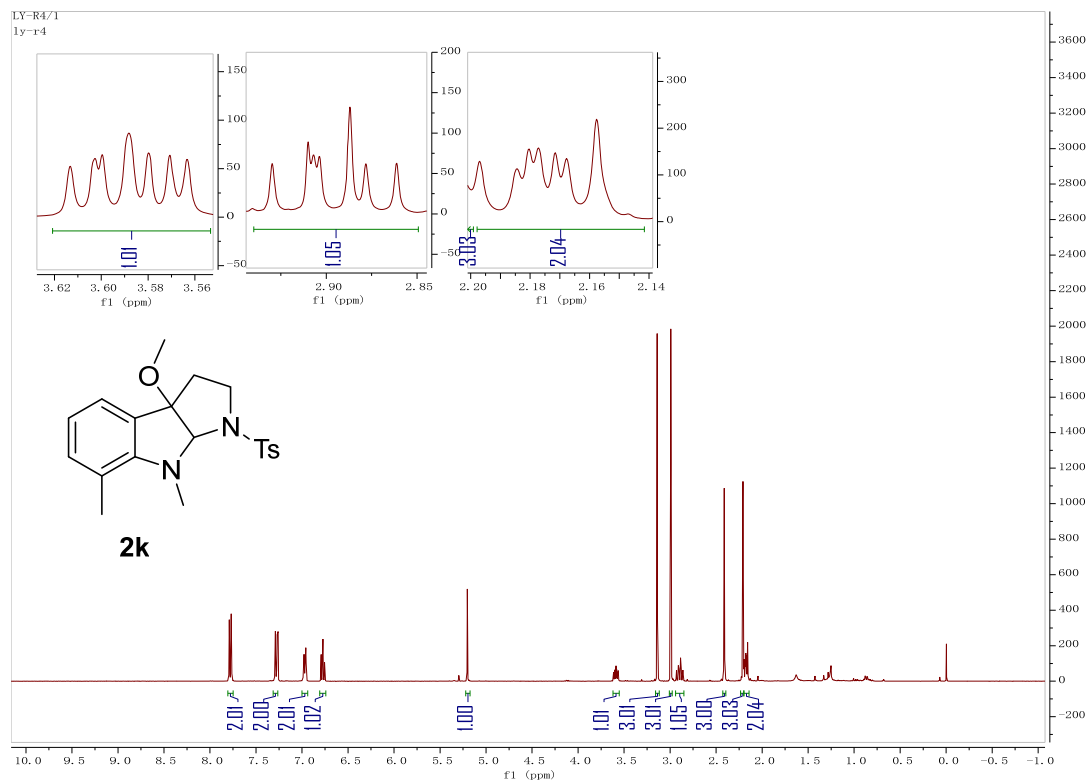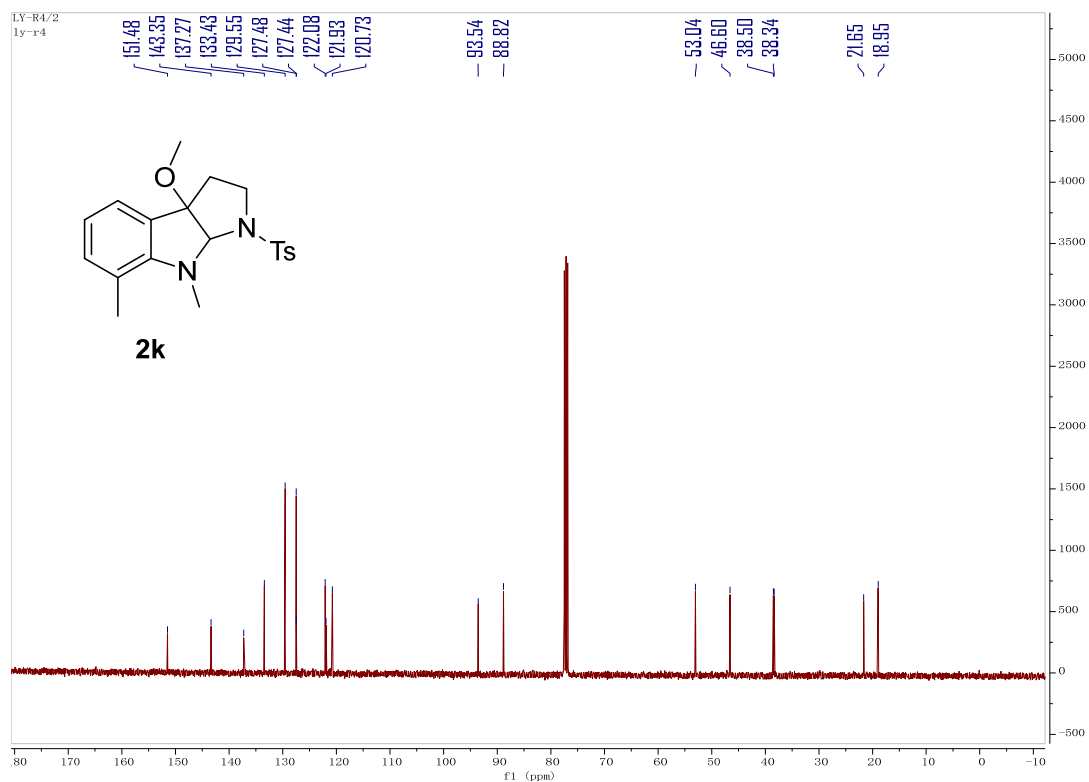

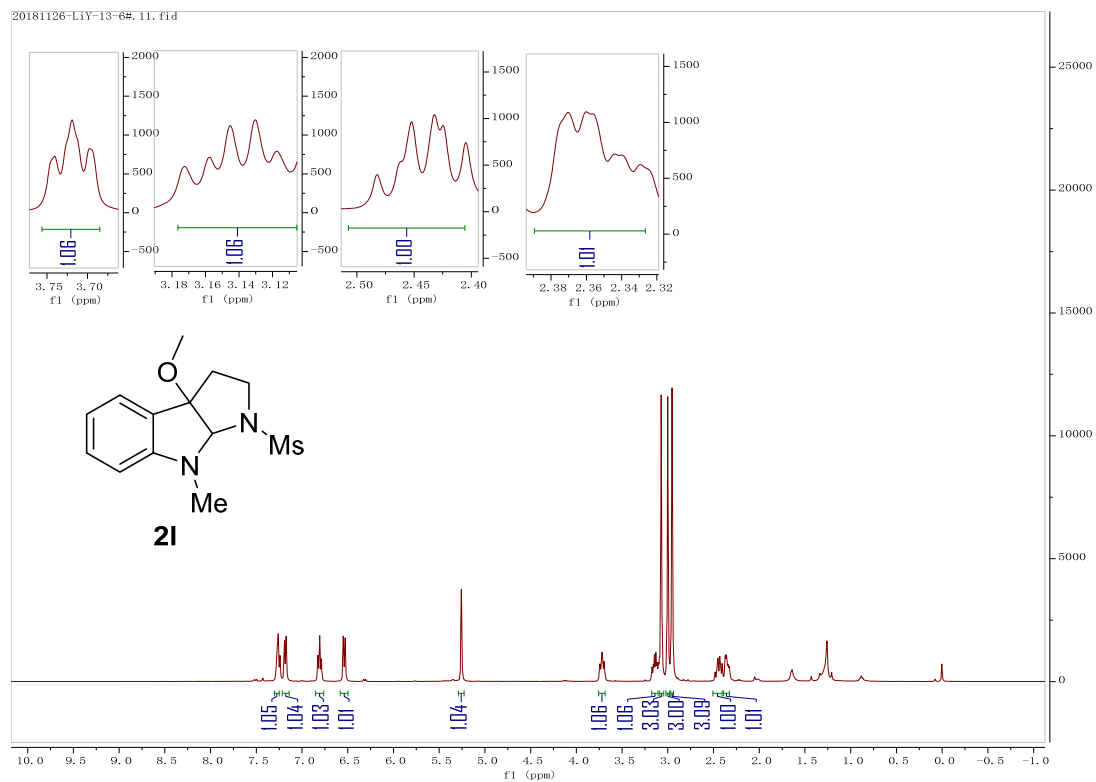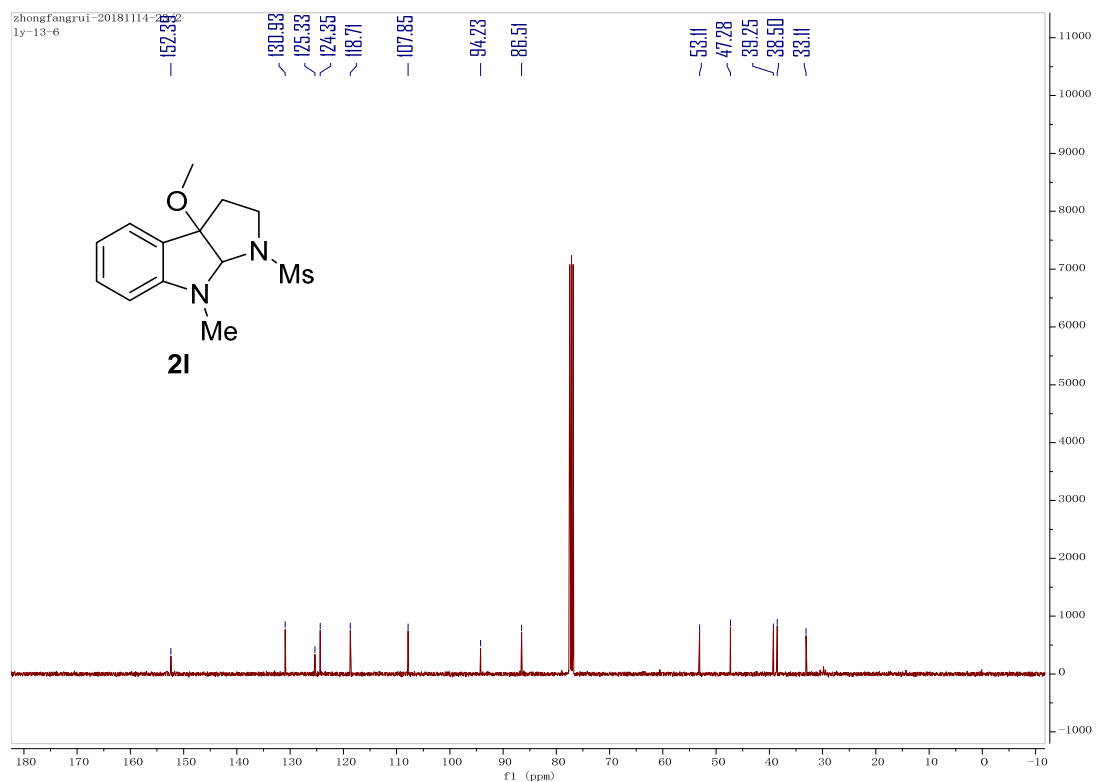

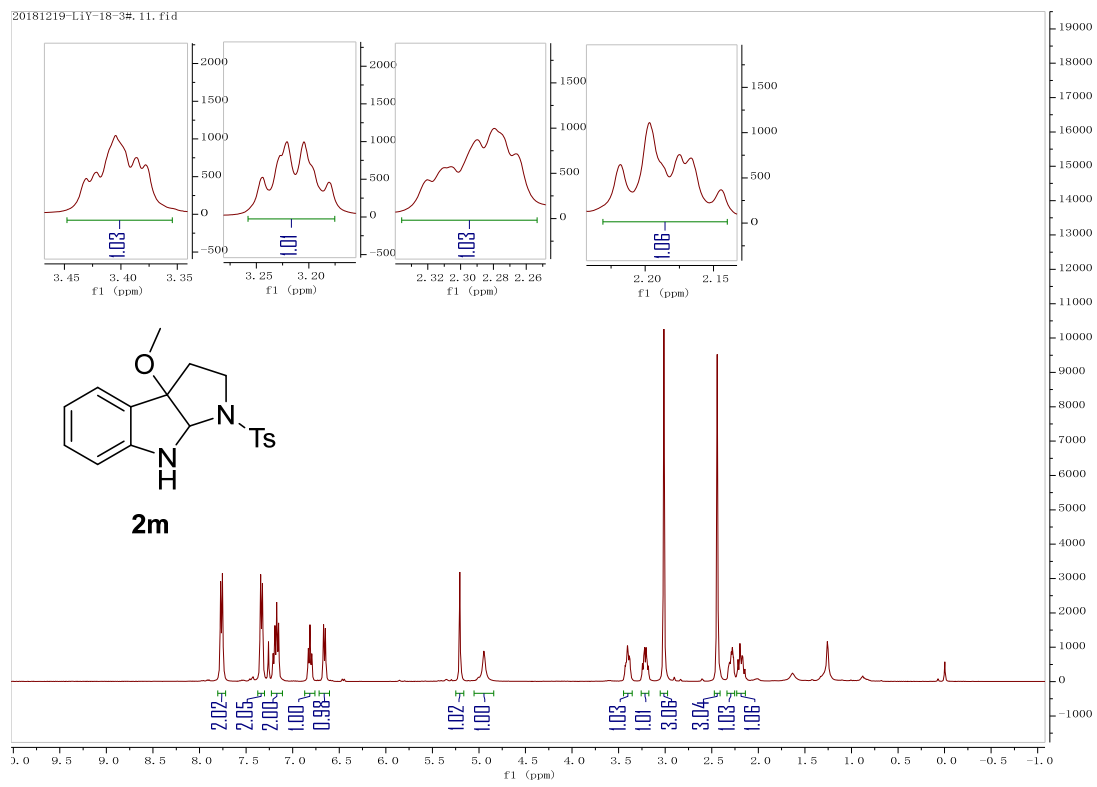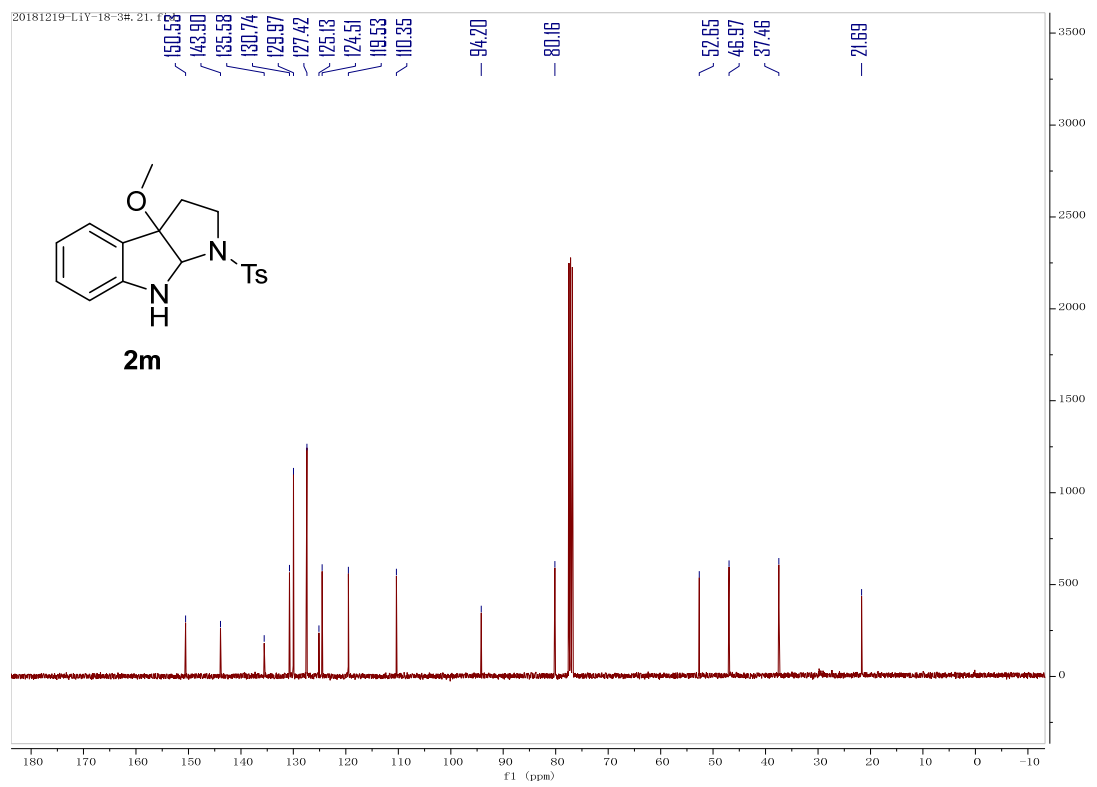

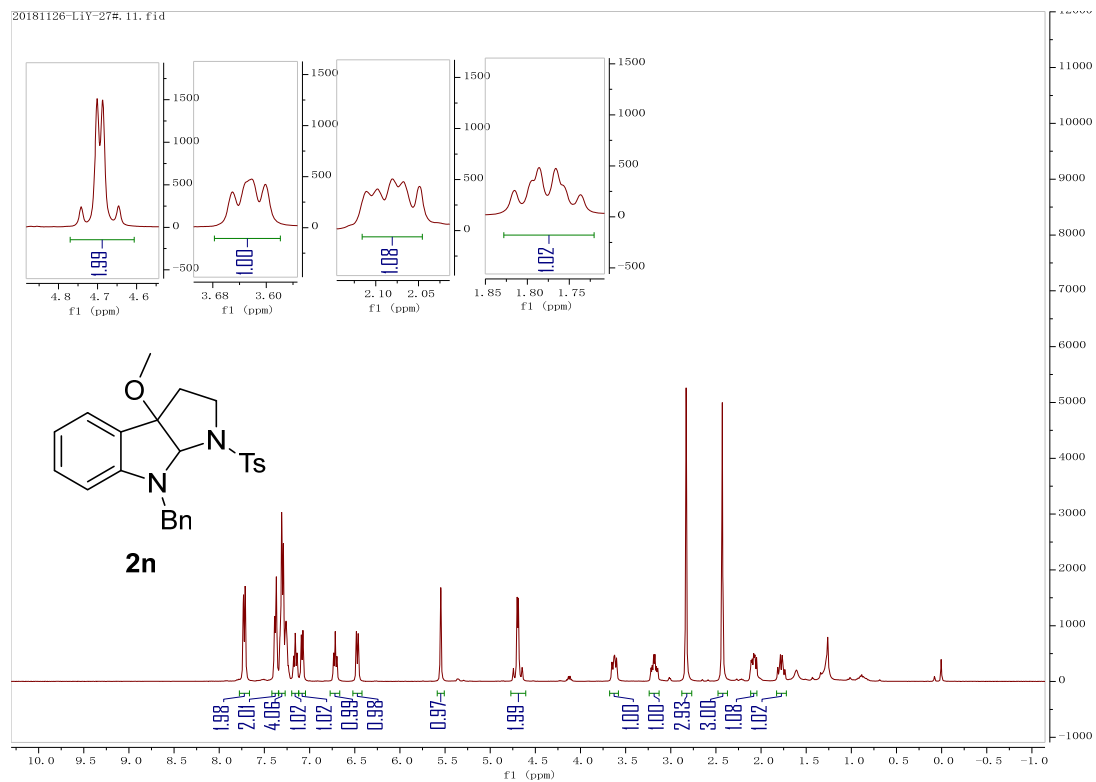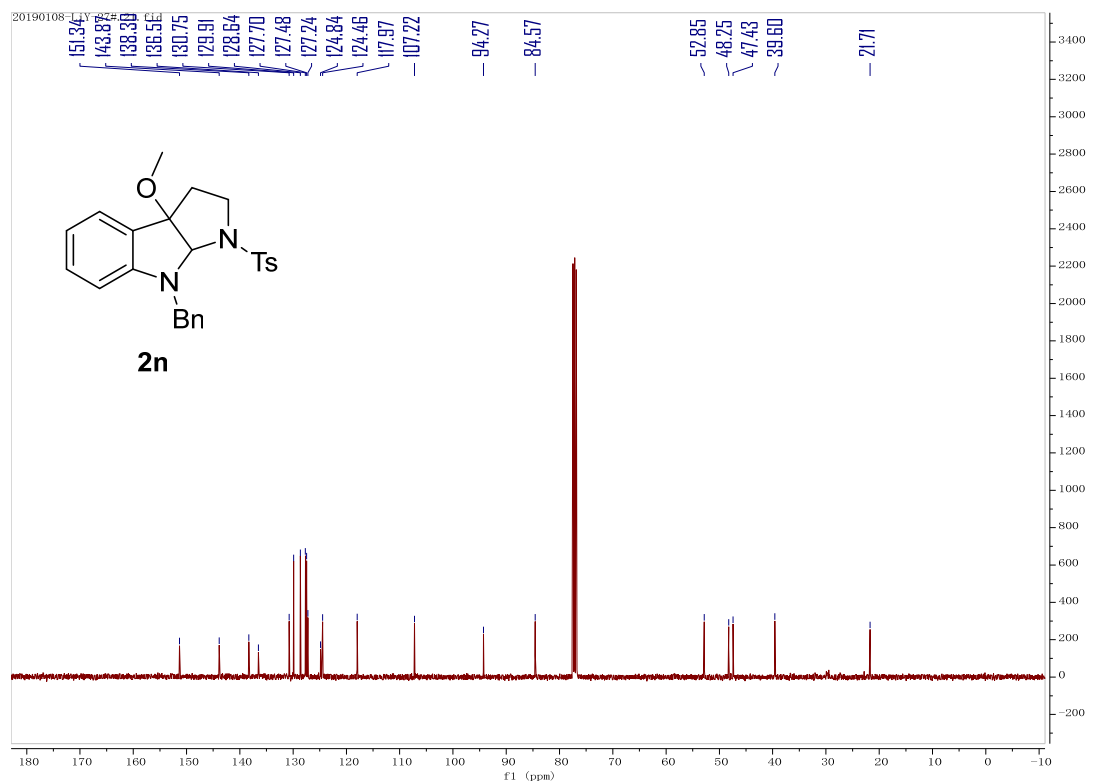

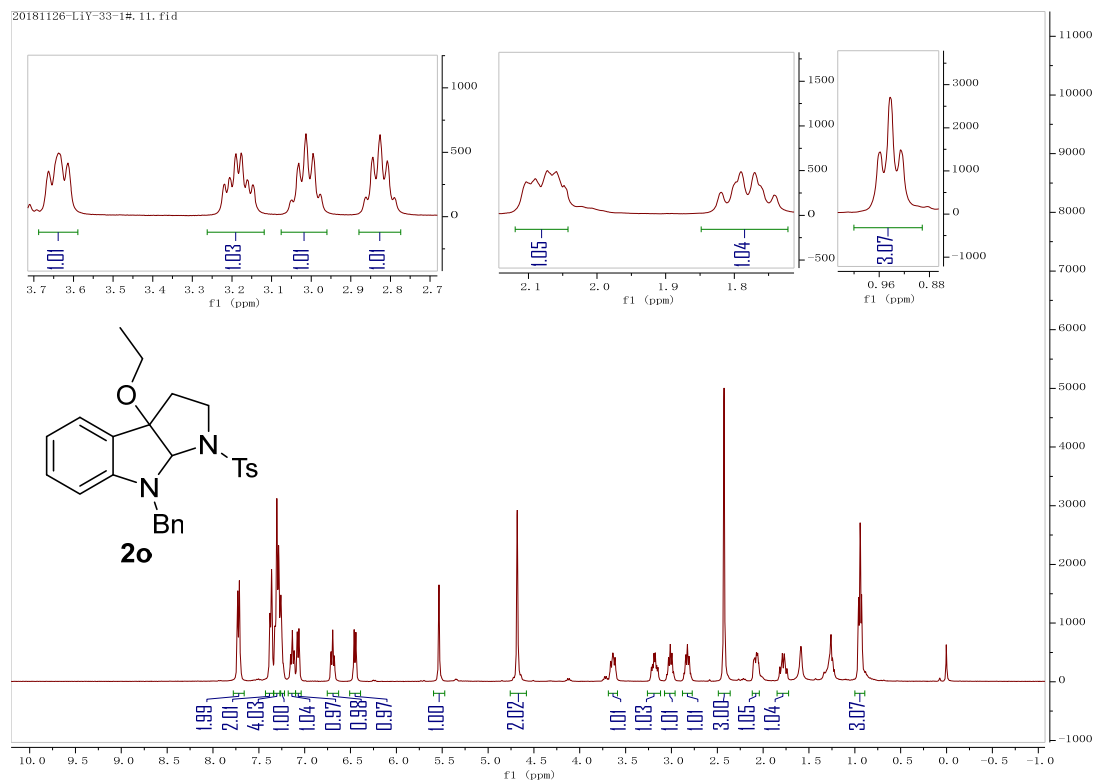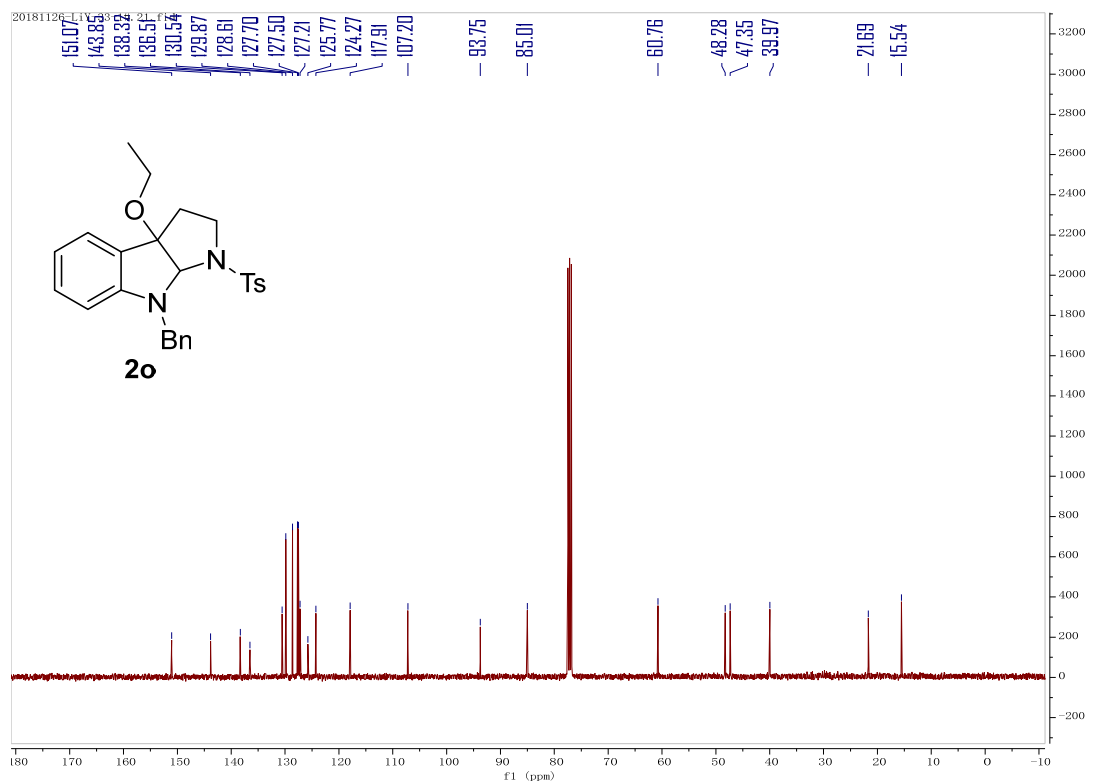

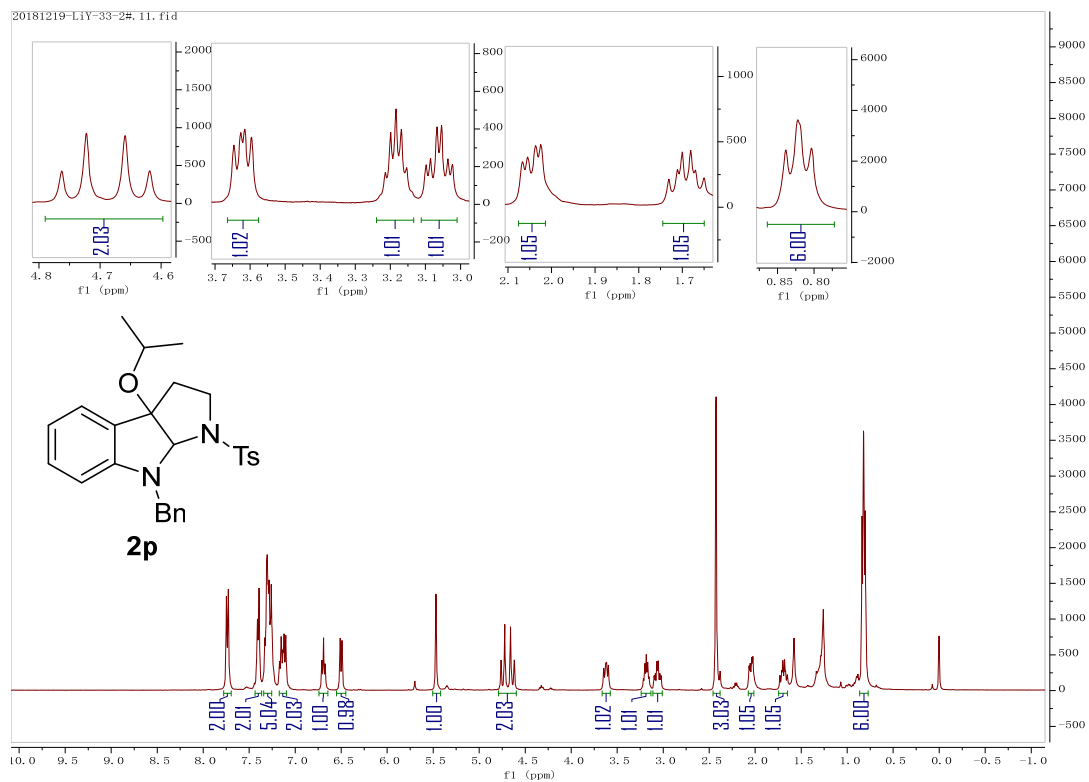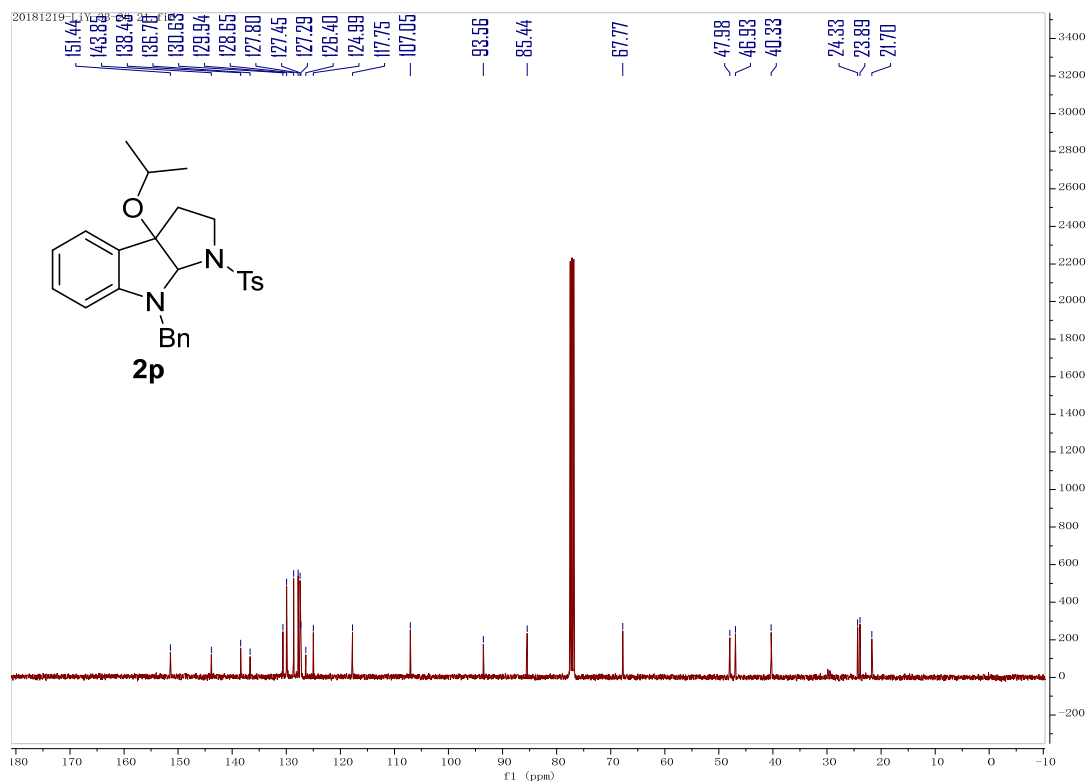



LY-32-2-2/1  
ly-32-2-2

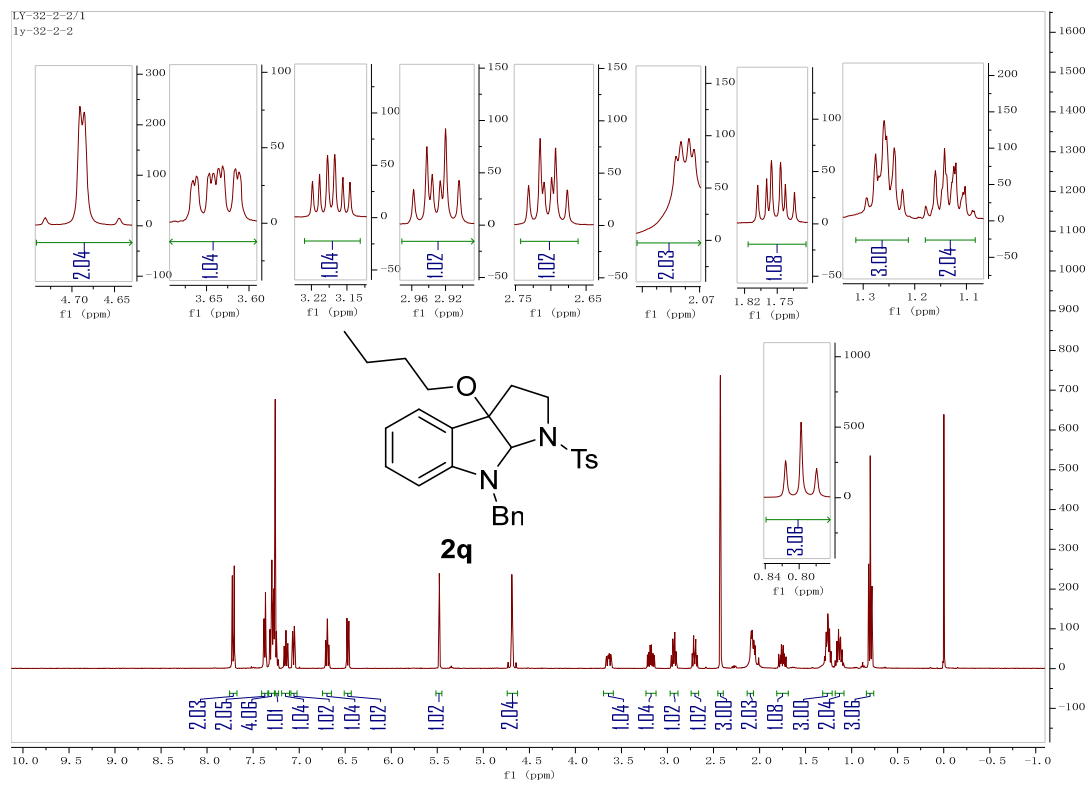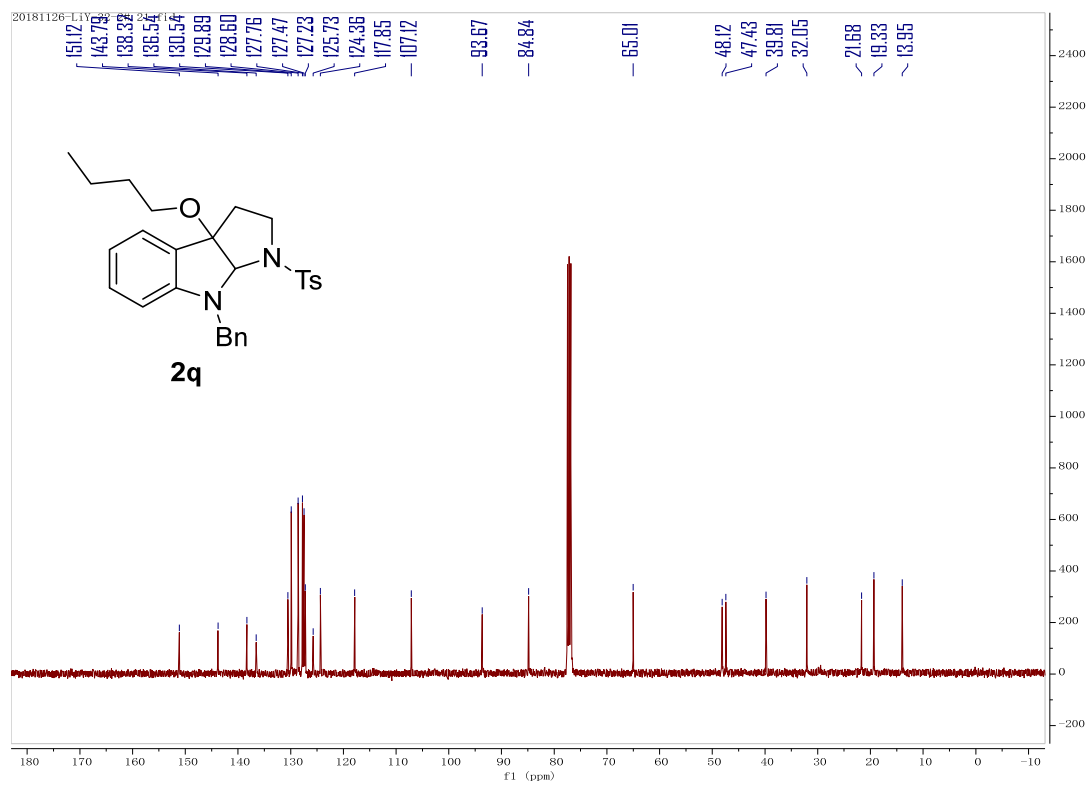

LY-32-3-2/1  
 ly-32-3-2

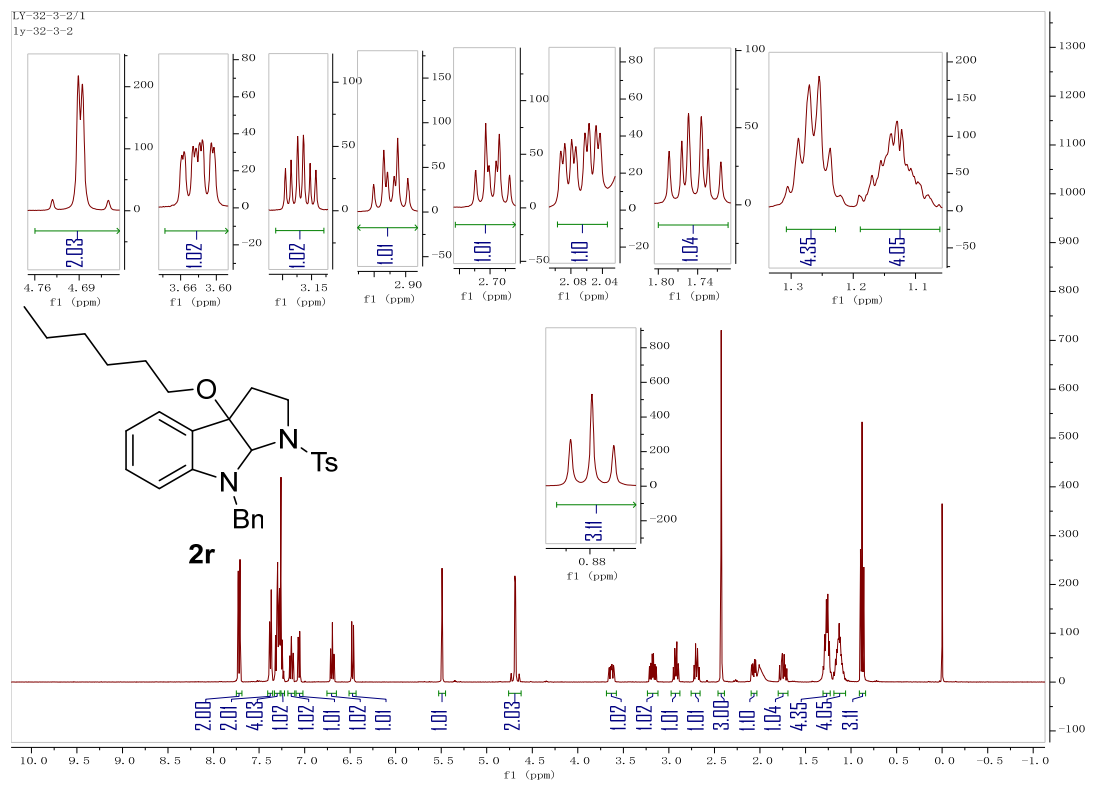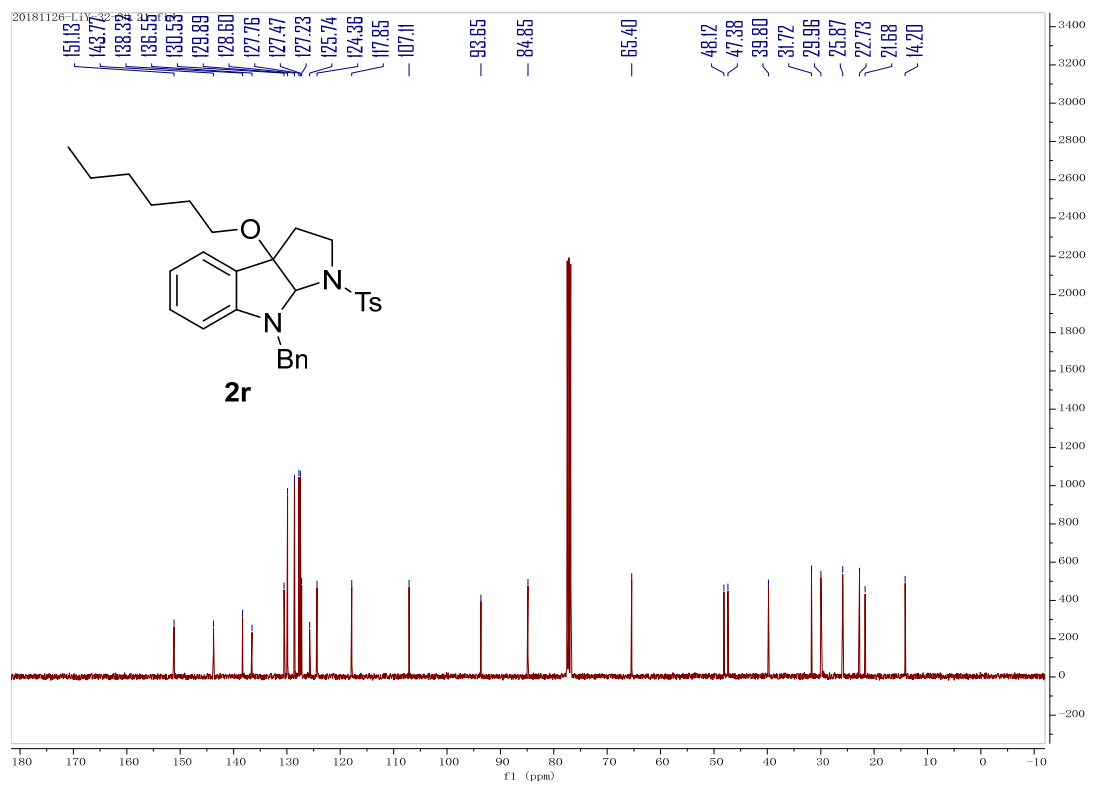

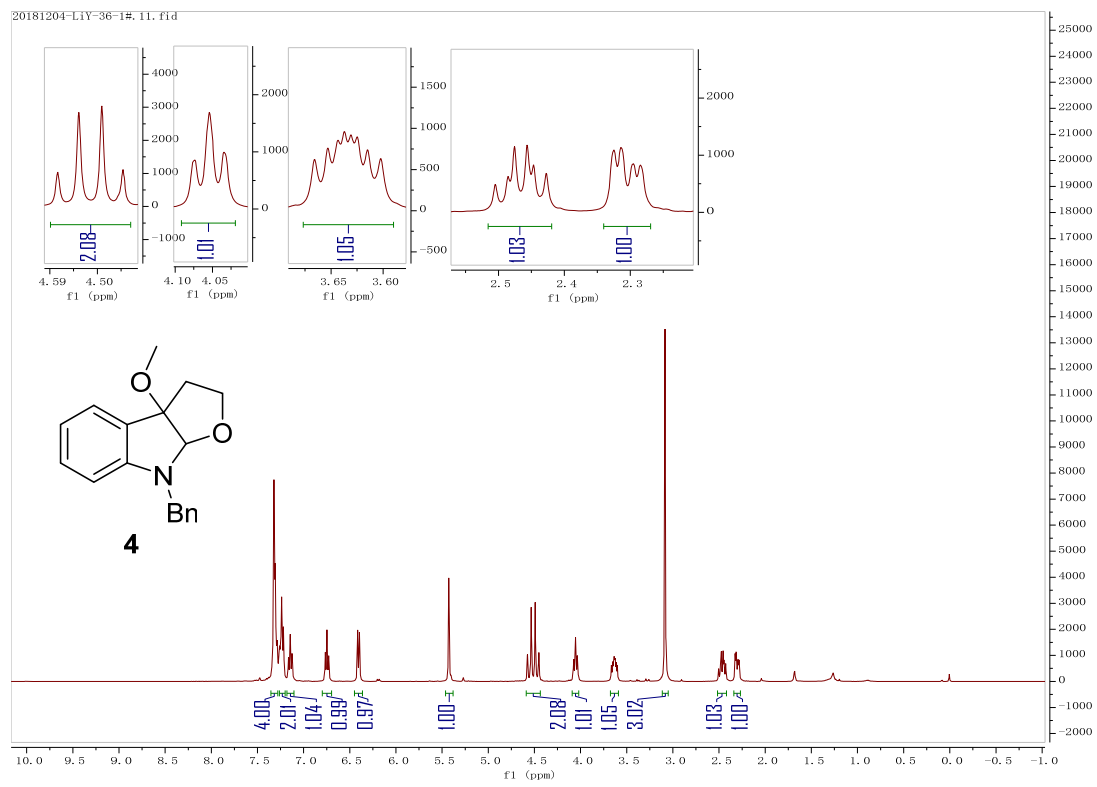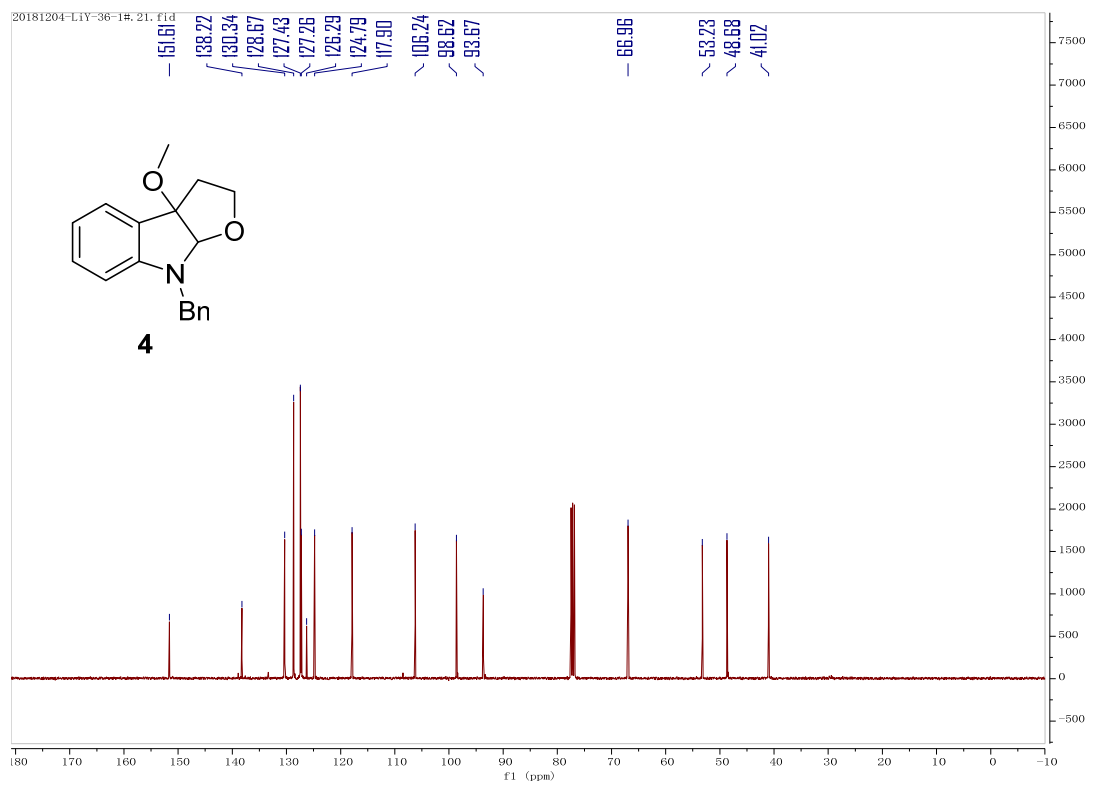

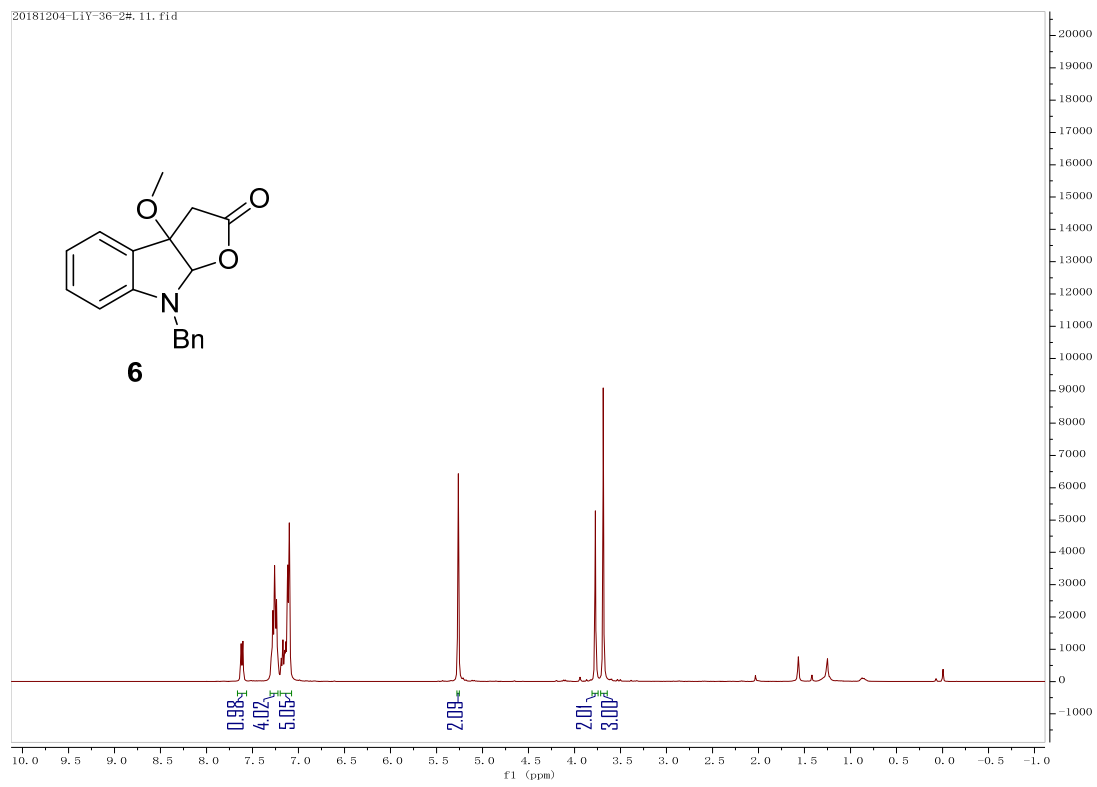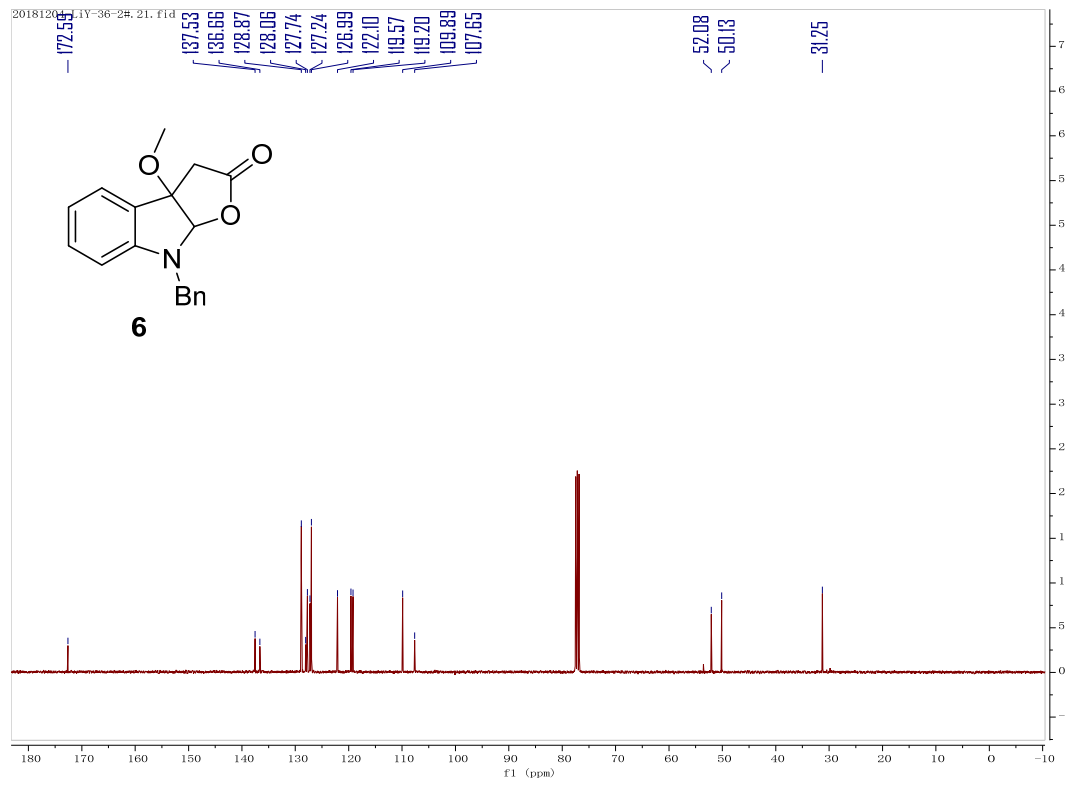

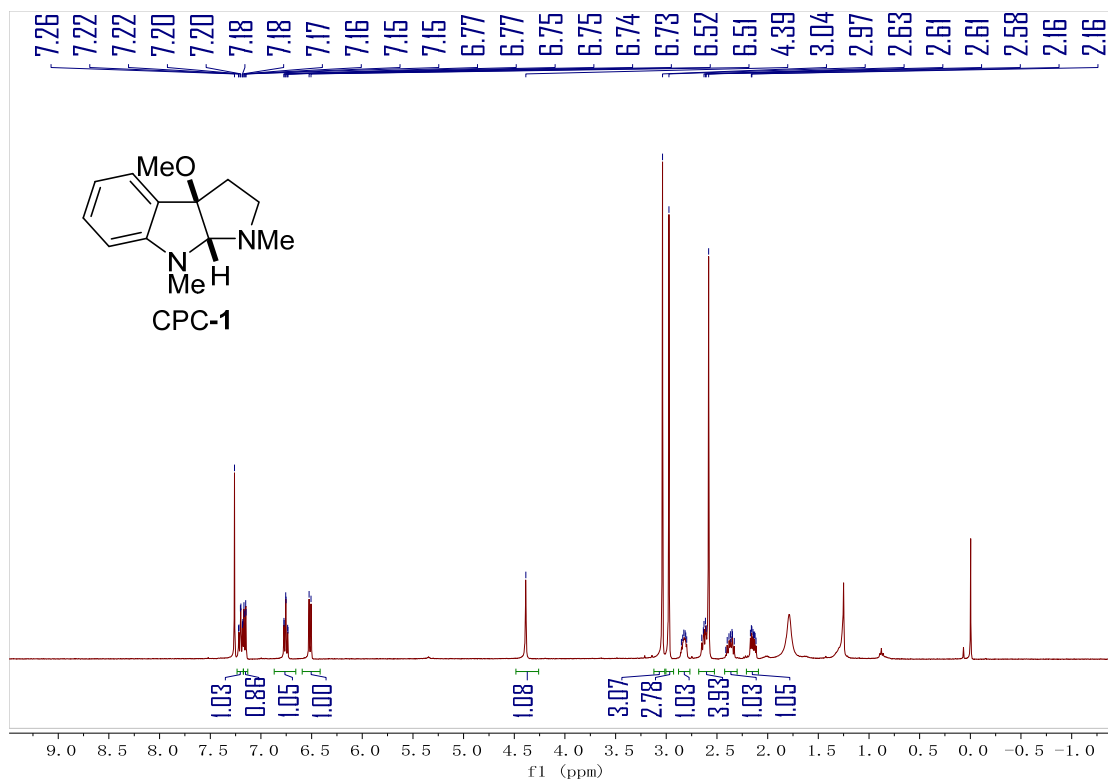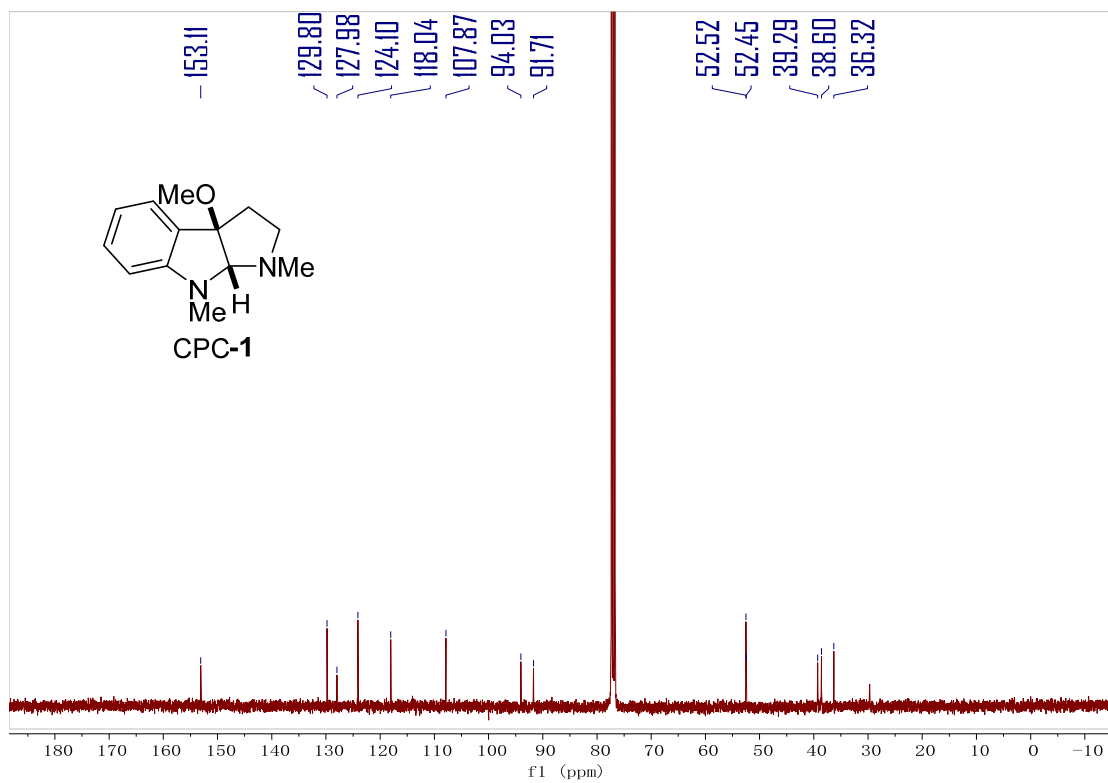

Supplement: c9ob02287b1.pdf [file c9ob02287b1.pdf]
